1           **The association between the *HLA-DRB1* shared epitope alleles and the risk of**  
2           **rheumatoid arthritis is influenced by massive gene-gene interactions.**

3

4 Lina-Marcela Diaz-Gallo,<sup>1\*</sup> Daniel Ramsköld,<sup>1</sup> Klementy Shchetynsky,<sup>1</sup> Lasse Folkersen,<sup>2</sup>  
5 Karine Chemin,<sup>1</sup> Boel Brynedal,<sup>3</sup> Steffen Uebe,<sup>4</sup> Yukinori Okada,<sup>5,6</sup> Lars Alfredsson,<sup>3</sup> Lars  
6 Klareskog,<sup>1</sup> Leonid Padyukov<sup>1\*</sup>

7       1.     Rheumatology Unit, Department of Medicine Solna, Karolinska Institutet,  
8           Karolinska University Hospital, Stockholm SE-171 76, Sweden

9       2.     Department of Bioinformatics, Technical University of Denmark DK-2800,  
10          Lyngby, Denmark

11      3.     Institute of Environmental Medicine, Karolinska Institutet, Stockholm SE-171 77,  
12          Sweden

13      4.     Human Genetics Institute, Universitätsklinikum Erlangen, Erlangen 91012,  
14          Germany

15      5.     Department of Statistical Genetics, Osaka University Graduate School of Medicine,  
16          Suita, Osaka 565-0871, Japan

17      6.     Laboratory of Statistical Immunology, Immunology Frontier Research Center  
18          (WPI-IFReC), Osaka University, Suita 565-0871, Japan

19      \*Corresponding authors:

20      E-mail: [lina.diaz@ki.se](mailto:lina.diaz@ki.se), [leonid.padyukov@ki.se](mailto:leonid.padyukov@ki.se)

21      LMDG ORCID: [orcid.org/0000-0002-5688-0102](https://orcid.org/0000-0002-5688-0102)

22

23

24 **Abstract**

25 In anti-citrullinated protein antibody positive rheumatoid arthritis (ACPA-positive RA), a  
26 particular subset of *HLA-DRB1* alleles, called shared epitope alleles (SE), is the highest genetic  
27 risk factor. Here, we aimed to investigate whether gene-gene interactions influence this *HLA-*  
28 *DRB1* related major disease risk; specifically, we set out to test if non-*HLA* SNPs, conferring  
29 low diseases risk on their own, can modulate the *HLA-DRB1* SE effect to develop ACPA-  
30 positive RA.

31 To address this question, we computed the attributable proportion (AP) due to additive  
32 interaction at genome-wide level for two independent ACPA-positive RA cohorts: the Swedish  
33 EIRA and the North American NARAC. We found a strong enrichment of significant  
34 interactions (AP p-values<0.05) between the *HLA-DRB1* SE alleles and a group of SNPs  
35 associated with ACPA-positive RA in both cohorts (Kolmogorov-Smirnov [KS] test D=0.35  
36 for EIRA and D=0.25 for NARAC, p<2.2e-16 for both). Interestingly, 201 out of 1,492 SNPs  
37 in consistent interaction for both cohorts, were eQTLs in SE alleles context in PBMCs from  
38 ACPA-positive RA patients. Finally, we observed that the effect size of *HLA-DRB1* SE alleles  
39 for disease decreases from 5.2 to 2.5 after discounting the risk alleles of the two top interacting  
40 SNPs (rs2476601 and rs10739581, AP FDR corrected p <0.05).

41 Our data demonstrate that the association between the *HLA-DRB1* SE alleles and the risk of  
42 ACPA-positive RA is modulated by massive genetic interactions with non-*HLA* genetic  
43 variants.

44

45

46

## 47 **Introduction**

48 Additive interaction, defined as the deviation from the expected sum of the effects of two  
49 different factors, is a way to explore the complexity of how individual genetic risk variants  
50 interplay in the development of complex diseases. However, the possibility to address these  
51 additive interactions between candidate variants is often limited by low statistical power.  
52 Additionally, genome-wide gene-gene interaction studies conceivably result in a high number  
53 of false negative results due to the massive and conservative correction for multiple testing. An  
54 alternative strategy to study interaction is to identify genetic “hubs” that may accumulate  
55 multiple interactions with different variants. As a result of these interactions, such genetic  
56 “hubs” may have a strong influence on the risk of disease.

57 In rheumatoid arthritis (RA [OMIM: 180300]), a particular subset of *HLA-DRB1* gene variants  
58 (major alleles at \*01, \*04, and \*10 groups), commonly called shared epitope (SE) alleles, is the  
59 most important genetic contributor for the risk of developing anti-citrullinated protein antibody  
60 (ACPA) positive RA (1, 2). It is noteworthy that the strength of the association between non-  
61 *HLA* genetic variants and ACPA-positive RA risk is, in general, very moderate in comparison  
62 to that of the *HLA-DRB1* SE alleles (3-6), (Fig. 1a). This prompted us to suggest that the *HLA-*  
63 *DRB1* SE alleles could be a genetic “hub” that captures multiple interactions. Indeed, previous  
64 studies have demonstrated interactions between the *HLA-DRB1* SE alleles and several SNPs,  
65 including variations in *PTPN22*, *HTR2A*, and *MAP2K4* with regard to the risk of developing  
66 ACPA-positive RA (7-10), where the combination of both risk factors shows significantly  
67 higher risk (measured as odds ratio (OR)) than the sum of their separate effects. Departure from  
68 additivity is a way to define and subsequently demonstrate interaction between risk factors  
69 regarding the risk of disease. The additive scale, defined by attributable proportion (AP), has  
70 the advantage of a straightforward interpretation in the sufficient-component cause model  
71 framework (7, 11-14).

72 In our current study, we aimed to investigate whether gene-gene interactions influence the  
73 major *HLA-DRB1* related disease risk to develop ACPA-positive RA; more specifically, we set  
74 out to test if non-*HLA* SNPs, conferring low diseases risk on their own, can modulate the *HLA-*  
75 *DRB1* SE effect to develop ACPA-positive RA. First, we assessed departure from additivity  
76 regarding the interaction between the *HLA-DRB1* SE alleles and SNPs at the genome-wide  
77 level. The outcome of this analysis was tested for the enrichment of significant interactions by  
78 comparing the distribution of studied statistics (p-value of interaction) between two defined  
79 groups of SNPs: the pool of SNPs which exhibited a significant nominal association with  
80 ACPA-positive RA in comparison to SNPs that are not associated with disease risk. Second,  
81 we performed the same type of analysis in an independent ACPA-positive RA cohort in order  
82 to replicate our findings. Third, we analyzed the effect size from the *HLA-DRB1* SE alleles with  
83 regard to risk of ACPA-positive RA before and after step-by-step discount of the risk alleles of  
84 the strongest SNPs in interaction with SE. Finally, we performed an expression quantitative  
85 trait loci (eQTL) analysis stratifying by the *HLA-DRB1* SE alleles and pathway enrichment  
86 analysis, in a further step to contextualize the selected SNPs in interaction with the *HLA-DRB1*  
87 SE alleles from both studied cohorts. Our observations indicated that the effect of the *HLA-*  
88 *DRB1* SE alleles in the development of ACPA-positive RA is influenced by interactions with  
89 multiple non-*HLA* genetic factors, supporting the concept that these *HLA-DRB1* alleles act as a  
90 “hub” of cumulative additive interactions with multiple genetic variants. We proposed with the  
91 present methodology a novel approach to study the impact of gene-gene interactions with *HLA*  
92 alleles in autoimmune diseases.

93

94

## 95 Results

96 This project was based on genome wide association studies (GWAS) data from two independent  
 97 case control studies of RA, Epidemiological Investigation of Rheumatoid Arthritis (EIRA) (5,  
 98 12, 15-18) and North American Rheumatoid Arthritis consortium (NARAC) (5, 16, 19, 20).  
 99 The overall methodology workflow is shown in Fig. 1b. We assessed pair additive interactions,  
 100 measured by AP, between the *HLA-DRB1* SE alleles and non-*HLA* SNPs in EIRA and NARAC.  
 101 We used the described workflow (Fig. 1b) in parallel to both the original genotyped data sets,  
 102 the imputed data sets and the rs4507692 SNP instead of the *HLA-DRB1* SE alleles. The  
 103 rs4507692 was considered as a negative control, since this variant exhibit the same minor allele  
 104 frequency (MAF) as *HLA-DRB1* SE alleles but is not associated to ACPA-positive RA (Table  
 105 1). We tested for enrichment of significant interactions between two predefined groups of SNPs,  
 106 the ACPA-positive RA risk SNPs (nominal p-value of association < 0.05) and the ACPA-  
 107 positive RA non-risk SNPs (nominal p-value of association  $\geq$  0.05) using the Kolmogorov-  
 108 Smirnov (KS) test. The KS test statistic quantifies the maximum distance (D) between the two  
 109 empirical cumulative distribution functions (ECDF) of the AP p-values from the risk and non-  
 110 risk SNPs groups.

111

112 **Table 1.** Description of studied populations.

| Study              | Number of individuals | Female: Male ratio | Frequency of <i>HLA-DRB1</i> SE alleles | rs4507692 MAF and nominal p-value of association | Number SNPs in GWAS <sup>b</sup> | Number SNPs in imputed GWAS <sup>b</sup> |
|--------------------|-----------------------|--------------------|-----------------------------------------|--------------------------------------------------|----------------------------------|------------------------------------------|
| EIRA               |                       |                    | 0.45                                    | MAF=0.45<br>p-value=0.57                         | 282,527                          | 4,756,851                                |
| Cases <sup>a</sup> | 1,151                 | 2.4:1              | 0.59                                    |                                                  |                                  |                                          |
| Controls           | 1,079                 | 2.6:1              | 0.30                                    |                                                  |                                  |                                          |
| NARAC              |                       |                    | 0.43                                    | MAF=0.43<br>p-value=0.67                         | 398,551                          | 9,032,420                                |
| Cases <sup>a</sup> | 867                   | 2.8:1              | 0.68                                    |                                                  |                                  |                                          |
| Controls           | 1,194                 | 2.5:1              | 0.26                                    |                                                  |                                  |                                          |

113 <sup>a</sup> ACPA-positive Rheumatoid Arthritis (RA) patients.

114 <sup>b</sup> After removing the extended MHC region.

115

116  
 117 *Interaction of the HLA-DRB1 SE alleles with ACPA-positive RA associated SNPs is more*  
 118 *common than with non-associated SNPs*  
 119 EIRA was considered as a discovery cohort to test for enrichment of significant interactions  
 120 between the *HLA-DRB1* SE alleles and the set of SNPs enriched for risk SNPs from this study.  
 121 The risk SNPs represent 5% of the variants analyzed for interaction in EIRA. Out of these risk  
 122 SNPs, 24.5% of them exhibited an AP p-value (attributable proportion due to interaction p-  
 123 value) less than 0.05 (Table 2, Fig. 2a). On the other hand, among the non-risk variants (nominal  
 124 p-values of association  $\geq 0.05$ ) representing the remaining SNPs analyzed for interaction in  
 125 EIRA, only 2.8% displayed a significant interaction (AP p-value  $< 0.05$ ) with the *HLA-DRB1*  
 126 SE alleles (Table 2, Fig. 2b). Thus, there is a dramatic difference in the frequency of significant  
 127 interactions with the *HLA-DRB1* SE alleles between the risk and non-risk SNPs in ACPA-  
 128 positive RA. This observation is reflected in the KS test, where a striking difference was  
 129 observed between the AP p-values' distributions of risk and non-risk SNPs with a D value of  
 130 0.35 (KS test p-value  $< 2.2e-16$ ) (Table 2 and Fig. 2c).

131  
 132 **Table 2.** The Kolmogorov-Smirnov (KS) test for AP p-values distributions of the interaction  
 133 analysis with the *HLA-DRB1* SE alleles and risk or non-risk SNPs in EIRA and NARAC  
 134 imputed data.

| Case-Control Group | SNPs group | Number of initial input SNPs | Number of SNPs after cut off <sup>a</sup> | % of SNPs analyzed | Number of SNPs with AP p-value $< 0.05$ | % of analyzed SNPs with AP p-value $< 0.05$ | D <sup>+</sup> value from KS test <sup>b</sup> | Group of SNPs with enrichment of significant interactions |
|--------------------|------------|------------------------------|-------------------------------------------|--------------------|-----------------------------------------|---------------------------------------------|------------------------------------------------|-----------------------------------------------------------|
| EIRA               | Risk       | 241,759                      | 160,358                                   | 66.33              | 39,518                                  | 24.64                                       | 0.354                                          | Risk                                                      |
|                    | No-risk    | 4,515,110                    | 2,979,344                                 | 65.99              | 83,287                                  | 2.80                                        |                                                |                                                           |
| NARAC              | Risk       | 787,499                      | 209,890                                   | 26.65              | 31,992                                  | 15.24                                       | 0.247                                          | Risk                                                      |
|                    | No-Risk    | 8,244,955                    | 1,916,701                                 | 23.25              | 64,012                                  | 3.44                                        |                                                |                                                           |

<sup>a</sup> Interaction was done using sex and the 10 first eigenvectors as co-variables. Cutoff used a minimum of 5 individuals for each of the OR combinations.

<sup>b</sup> The alternative hypothesis for KS test (Kolmogorov-Smirnov test) was that the ECDF (empirical cumulative distribution function) of AP p-values for risk SNPs lies above that of non-risk SNPs (Figure 2). KS test p-value  $< 2.2e-16$  for both EIRA and NARAC. As it is mentioned in the materials and methods, these KS test p-values are lower than the machine precision, meaning that when the precise p-value was calculated the result was 0.

141  
142 The difference in the distribution of the whole spectrum of AP p-values does not directly inform  
143 about the performance of the values below significance threshold of 0.05. Therefore, we  
144 specifically tested for difference in this segment of the AP p-values distributions for risk and  
145 non-risk SNPs. We found a strong enrichment of significant interactions in the group of risk  
146 variants in comparison with the non-risk variants (KS test  $D=0.25$ , p-values  $<2.2e-16$ , Fig. 2d  
147 to Fig. 2f). This suggests that the significant difference between the ECDF from the risk and  
148 non-risk groups detected in the full distribution of AP p-values is principally due to the  
149 enrichment of small AP p-values in the risk group of SNPs.

150 Since genetic variants located in the *PTPN22* gene are the second most important genetic risk  
151 factor for RA in Caucasians (Fig. 1a), we excluded the SNPs of this locus from the analysis and  
152 tested for the enrichment of significant interactions between the *HLA-DRB1* SE alleles and the  
153 risk group of SNPs. The exclusion of the *PTPN22* locus did not remarkably affected the  
154 obtained D and p-values from the KS test ( $D=0.353$ , p-value $<2.2e-16$ ). This highlights that the  
155 enrichment of significant interactions between the ACPA-positive RA risk SNPs and the *HLA-*  
156 *DRB1* SE alleles is due to multiple variants, and it is not explained by the *PTPN22* locus alone.

157  
158 The ECDF difference between the AP p-values from the risk and non-risk variants almost  
159 disappeared completely when the rs4507692 SNP was tested instead of the *HLA-DRB1* SE  
160 variable as a negative control (Table 1, Supplementary Material Table S1). We found that the  
161 proportion of interacting risk SNPs with rs4507692 variant dropped to 2.8%, (Supplementary  
162 Material Table S1 and Fig. S1a to Fig. S1f). Since the same group of risk variants was tested  
163 for interaction with the *HLA-DRB1* SE alleles and rs4507692 SNP, we evaluated for differences  
164 in the AP p-value distributions between both set of analyses. This analysis confirmed that there  
165 is a high enrichment of significant interactions between the risk variants and the *HLA-DRB1*

166 SE alleles (D value=0.35, KS-test p-value< 2.2e-16, Supplementary Material Fig. S2a). These  
167 results demonstrate that the enrichment of interactions found for the *HLA-DRB1* SE alleles is  
168 unlikely due to a random effect and point to the specific role of the *HLA-DRB1* SE alleles in  
169 the architecture of gene-gene interaction in ACPA-positive RA.  
170 Consistent results were observed when the workflow was applied to only non-imputed  
171 genotyping data for EIRA (Supplementary Material Table S2). Additionally, we also removed  
172 all chromosome 6 markers (where the *MHC* region lies) to exclude any influence of LD with  
173 the *HLA-DRB1* SE alleles in this chromosome. In this analysis, we observed an enrichment of  
174 significant interactions between the *HLA-DRB1* SE alleles and the risk variants, either when  
175 only the *MHC* region was removed (KS-test D=0.33, p-value<2.2e-16, Supplementary Material  
176 Table S2) or when the entire chromosome 6 was removed (KS-test D=0.33, p-value<2.2e-16,  
177 Supplementary Material Table S2). No significant differences in the ECDF of AP p-values were  
178 observed when the rs4507692 SNP was implemented in the workflow instead of the *HLA-DRB1*  
179 SE alleles (KS-test D=0.006, p-value=0.39 for non-imputed EIRA GWAS without the *MHC*  
180 region and KS-test D=0.007, p-value=0.32 for the non-imputed SNPs GWAS without the  
181 chromosome 6, Supplementary Material Table S2). These results indicate that high LD variants  
182 present in the imputed GWAS data set do not inflate the difference between the ECDF of AP  
183 p-values from the interaction analysis of the *HLA-DRB1* SE alleles and groups of risk or non-  
184 risk SNPs.

185

186 *An independent replication supports the observed enrichment of significant interactions*  
187 *between the HLA-DRB1 SE alleles and the ACPA-positive RA associated SNPs.*

188 In order to confirm the results observed in the EIRA study, we applied the same methodology  
189 in the independent case-control NARAC study. Similar to EIRA, we found a higher enrichment  
190 of significant interactions between the *HLA-DRB1* SE alleles and the risk SNPs (15.2%) in



191 comparison to the significant interactions detected between the *HLA-DRB1* SE alleles and the  
192 non-risk SNPs (3.3%) (Table 2, Fig. 2g and Fig. 2h). The KS test reflected such a difference in  
193 the ECDF of the AP p-values, with a D value of 0.25 (p-value <2.2e-16, Table 2, Fig. 2i).  
194 Similar to our findings in the discovery cohort, the fraction of AP p-values below 0.05 is  
195 enriched in the risk group of SNPs compared to the non-risk group of variants in the NARAC  
196 study (D=0.17, p-value <2.2e-16, Fig. 2j to Fig. 2l). As in EIRA, when the rs4507694 SNP was  
197 used in the workflow instead of the *HLA-DRB1* SE alleles, there was not an enrichment of  
198 significant interactions in the risk group (2.6%) compared to the non-risk group (3%) of SNPs  
199 (Supplementary Material Table S1, Fig. S1g to Fig. S1l). Also, the distribution of AP p-values  
200 from the *HLA-DRB1* SE alleles and the risk SNPs is strongly different from the distribution of  
201 the AP p-values from the rs4507692 (with the same MAF as SE, but not associated to ACPA-  
202 positive RA) and the risk SNPs (KS test D=0.26, p-value<2.2e-16; Supplementary Material  
203 Fig. S2b). Consistent results were observed when genotyped sets of SNPs (non-imputed  
204 GWAS) were used for the analyses in the NARAC study (Supplementary Material Table S2).

205  
206 *Step-by-step discount of the risk alleles of top interacting SNPs decreases the HLA-DRB1 SE*  
207 *risk for ACPA-positive RA.*

208 The definition of additive interaction model predicts that removing individuals with an  
209 interacting allele from the analysis should decrease the effect size of the *HLA-DRB1* SE alleles  
210 among the remaining subjects. To directly determine if the OR for the *HLA-DRB1* SE alleles in  
211 ACPA-positive RA is affected by the absence or presence of other risk alleles from SNPs in  
212 interaction with the *HLA-DRB1* SE alleles, we calculated the combined OR for the *HLA-DRB1*  
213 SE alleles, including and excluding the effect of two of the top SNPs in interaction. Figure 3  
214 shows how the combined OR is affected by the exclusion of individuals with one or both of the  
215 risk alleles of the selected SNPs in combination with the *HLA-DRB1* SE alleles. Importantly,

216 in EIRA, removing the risk alleles gradually decreases the ORs from 11.48 (8.9-14.9 95%CI;  
217 YGG: SE positive, rs2077507G, rs1004664G) to 3.97 after removing one risk allele (95%CI:  
218 3.3 - 4.7; YAG: SE positive, rs2077507A, rs1004664G) or to 4.11 after removing the other risk  
219 allele (95%CI: 3.3 – 5.1; YGT: SE positive, rs2077507G, rs1004664T) and finally, to an OR of  
220 2.57 when both risk alleles are removed (95%CI: 2.2 – 2.9; YAT: SE positive, rs2077507A,  
221 rs1004664T, Fig. 3a). A similar result was seen in the NARAC study for the top interacting  
222 SNPs (Fig. 3b). This gradual drop in effect size indicates that the high OR of the *HLA-DRB1*  
223 SE alleles in the disease could be at least partially attributed to the interaction with other SNPs,  
224 which exhibit modest individual effect on the risk for ACPA-positive RA.

225

226 *An exploration of selected SNPs in interaction with the HLA-DRB1 SE alleles from EIRA and*  
227 *NARAC.*

228 We identified 1,492 SNPs in interaction with the *HLA-DRB1* SE alleles with AP p-values <0.05  
229 and the same direction of AP when comparing the results from the EIRA and NARAC studies  
230 (Supplementary Material Table S3).

231 Figures 4a and 4b visualize how these 1,492 SNPs are distributed across the genome. We ranked  
232 the chromosomes based on the minimum AP p-value, the maximum AP value, and the  
233 percentage of these 1,492 SNPs in interaction with the *HLA-DRB1* SE alleles (Supplementary  
234 Material Table S4). Based on these criteria, chromosomes 1 and 9 reach the highest position  
235 for both studied cohorts (minimum AP p-value 4.3e-10 in EIRA and 1.6e-08 in NARAC;  
236 Supplementary Material Table S4). Chromosomes 2, 7, 8, and 13 followed in the ranking when  
237 the results from both EIRA and NARAC were considered. The majority (84.6%) of these SNPs  
238 in interaction with the *HLA-DRB1* SE alleles exhibited a positive AP, and most of them had  
239 values under 0.5 (Fig. 4a and Fig. 4b). The genotypes of 201 variants out of 1,492 (13.5%) were  
240 statistically significant correlated with the expression of different genes located 2Mb around

241 them, in peripheral blood mononuclear cells (PBMCs) from the ACPA-positive RA patients,  
242 when the *HLA-DRB1* SE alleles stratification was applied (SE-eQTLs). Supplementary  
243 Material Table S5 contains a complete list of the SNP-gene pairs that exhibited a false discovery  
244 rate (FDR)  $q$ -value < 0.05 for the SE-eQTLs analysis. Among the top SE-eQTLs are  
245 rs10404242-*TLE6* (transducing like enhancer of split 6) at chromosome 19, rs5763638-*ZNRF3*-  
246 *ASI* (*ZNRF3* antisense RNA 1) at chromosome 22, rs28513183-*HSD11B1* (hydroxysteroid 11-  
247 beta dehydrogenase 1) at chromosome 1, and rs1781279-*MTPAP* (mitochondrial poly(A)  
248 polymerase) at chromosome 10 (Supplementary Material Fig S3). Since these SE-eQTLs are  
249 context related, it gives biological evidence for the statistically detected interactions between  
250 these variants and the *HLA-DRB1* SE alleles.

251 The loci 9q33 (Fig. 4c and Fig. 4d) and 1p13 (Fig. 4g and Fig. 4h) contain the SNPs in  
252 interaction with the *HLA-DRB1* SE alleles that exhibited the lowest AP  $p$ -values  
253 (Supplementary Material Table S3). Several SNPs in interaction with the *HLA-DRB1* SE alleles  
254 from the 9q33 locus are in moderate LD ( $r^2 \geq 0.6 \leq 0.8$ ) among them (Fig. 4c and Fig. 4d,  
255 Supplementary Material Table S3). For instance, the rs3761847 SNP is one of the top replicated  
256 variants (EIRA: AP=0.38, 95%CI=0.22-0.55, AP  $p$ -value=6.9e-6, FDR  $q$ -value=0.04;  
257 NARAC: AP=0.43, 95%CI=0.29-0.59, AP  $p$ -value=1.6e-8, FDR  $q$ -value=2.5e-4,  
258 Supplementary Material Table S3) which has previously been associated with RA (3, 5, 17, 21,  
259 22), and it is in moderated LD ( $r^2=0.73$ ) with the rs7033753 SNP, which is an SE-eQTL for the  
260 *GSN-ASI* (*GSN* antisense RNA 1) and *PHF19* (PHD finger protein 19) genes (Fig. 4f to Fig.  
261 4g, Supplementary Material Table S5). On the other hand, the top SNP in interaction with the  
262 *HLA-DRB1* SE alleles is the non-synonymous variant rs2476601 in the *PTPN22* gene located  
263 in the 1p13 locus (Fig. 4g and Fig. 4h). Although the interaction between rs2476601 SNP and  
264 the *HLA-DRB1* SE alleles in ACPA-positive RA has been reported previously (7), we observed  
265 in our SE-eQTLs analysis that the rs2476601 SNP is an SE-eQTL for *HIPK1* (homeodomain

266 interacting protein kinase 1), *PTPN22* (protein tyrosine phosphatase, non-receptor type 22), and  
267 *CSDE1* (cold shock domain containing E1) genes (Fig. 4i to Fig. 4k, Supplementary Material  
268 Table S5). Additionally, there is evidence from capture Hi-C technology that the rs2476601  
269 physically interacts with the *HIPK1* and *CSDE1* genes in foetal thymus cells, monocytes, CD4  
270 naïve T cells, CD8 naïve T cells, neutrophils and B cells (<https://www.chicp.org>)(23-25). This  
271 supports our finding of rs2476601 SNP as SE-eQTLs and suggest that the detected additive  
272 interaction with *HLA-DRB1* SE alleles in ACPA-positive RA likely reflect functional  
273 implication.

274  
275 We applied gene ontology (GO) analyses of these 1,492 selected SNPs and 56 terms where  
276 highlighted as significant after FDR correction (Supplementary Material Table S6). The list of  
277 significant GO terms, when ranked by the FDR hypergeometric q-value, is enriched by  
278 pathways related to regulation of secretion (5 terms), signaling (11 terms), cell differentiation  
279 and development (11 terms), immune cells related (3 terms) and bone disease related (5 terms),  
280 which are relevant to ACPA-positive RA.

281 Together, these results suggest the plausibility of the high impact of 1,492 selected SNPs for  
282 the pathogenesis of ACPA-positive RA through interaction with the *HLA-DRB1* SE alleles.  
283 Nevertheless, when multiple testing correction by FDR was applied 15 SNPs remain significant  
284 (from the 1p13 and 9q33 loci; AP FRD q-value < 0.05) in both EIRA and NARAC  
285 (Supplementary Material Table S3). Thus, these results require additional replication in  
286 independent cohorts of ACPA-positive RA patients and controls.

287 Finally, we observed that the step-by-step removal of the risk alleles of the two-top replicated  
288 SNPs in interaction with the *HLA-DRB1* SE alleles (rs2476601 at 1p13 and rs10739581 at 9q33,  
289 AP FDR q-value<0.05), decreases the effect size of SE alleles for ACPA positive RA in the  
290 studied cohorts (Fig 5). This observation also suggests that the association between the *HLA-*

291 *DRB1* SE alleles and the risk of ACPA-positive RA is at least partly influenced by multiple  
292 interactions with non-*HLA* genetic variants.

293

294

## 295 **Discussion**

296 Our study of two independent ACPA-positive RA cohorts demonstrates that the *HLA-DRB1* SE  
297 alleles are involved in multiple interactions with disease-associated SNPs in comparison to non-  
298 associated SNPs. We show evidence of gradual decrease of the effect size of the *HLA-DRB1*  
299 SE alleles in the risk of ACPA-positive RA after adjusting for top SNPs in interaction (Figs. 3  
300 and 5). Based on these findings, we would like to propose the *sovereignty hypothesis*, which  
301 suggests that the *HLA-DRB1* SE alleles act as a genetic hub of simultaneous multiple  
302 interactions with the non-*HLA* genetic variants that by themselves have a modest effect size in  
303 RA (OR<2), and in turn, cumulatively contribute to the high effect size of the *HLA-DRB1* SE  
304 alleles in development of the ACPA-positive RA. Our hypothesis deals with a missing link that  
305 integrates the *HLA* alleles with other genetic variations across the human genome in providing  
306 knowledge about the risk of developing this common autoimmune disease.

307 Low statistical power and inevitable high number of type I and type II errors hamper the  
308 genome-wide analysis of the gene-gene interactions in existing RA cohorts. Therefore, we  
309 chose to address the distribution of probabilities associated with the interaction statistics, AP  
310 (attributable proportion due to interaction), using a comparison between empirically observed  
311 ACPA-positive RA risk (nominal association p-values <0.05) and non-risk SNPs (nominal  
312 association p-values  $\geq 0.05$ ). With this relatively liberal threshold, we can expect that the first  
313 group will be enriched with true ACPA-positive RA associated variations, while the second  
314 group will be enriched with true non-associated variations. With this setup, our results clearly  
315 indicate that there is a strong difference in the distribution of p-values of interaction (AP p-

316 values) between both groups of predefined SNPs, and this difference is mainly due to an  
317 enrichment of small p-values of interaction between the *HLA-DRB1* SE alleles and the ACPA-  
318 positive RA associated polymorphisms. These observations are in line with our *sovereignty*  
319 *hypothesis*, which also has foundations in the sufficient-component cause model (14). This  
320 model suggests that diverse components are part of a sufficient cause for a disease in a given  
321 affected individual, where each sufficient cause can include one or more component causes and  
322 form a minimal set of conditions that yield disease (26). Our study demonstrated that the *HLA-*  
323 *DRB1* SE alleles are a relevant component (but non-sufficient by itself) in the cause of ACPA-  
324 positive RA by interacting with multiple non-essential genetic risk factors.

325 Interestingly, a study showed that interacting loci were part of radial epistatic networks, where  
326 the hub loci interacted with multiple quantitative trait loci (QTLs); the hub locus acts as a  
327 genetic capacitor that modifies the effect of the radial loci in the network (27). If we extrapolate  
328 Forsberg *et al.*'s (27) observations with our results, we could assume that in ACPA-positive  
329 RA the principal QTL hub is represented by the *HLA-DRB1* SE alleles. This hub concentrates  
330 a complex interaction network of multiple non-*HLA* QTLs, where the effects could be modified  
331 mutually.

332 Interactions between the variants of the *HLA* region in ACPA-positive RA could be expected  
333 and this together with the strong LD in this locus prompted us to exclude the extended *MHC*  
334 region from our study, for the sake of simplicity. A previous study has explored interactions  
335 among the different *HLA* alleles (8), nevertheless a more extended investigation of these  
336 intricate interactions is required.

337

338 The present finding of multiple polymorphisms interacting with the *HLA-DRB1* SE alleles and  
339 their mutual effect size influence in the risk for disease, suggest that many mechanisms will  
340 affect the impact of *HLA-DRB1* SE alleles in the context of ACPA-positive RA. Although the

341 present analysis was mainly performed with statistical methods, some preliminary functional  
342 mechanisms can be extrapolated from our data. Indeed, the statistical approach in our study  
343 resulted in a list of 1,492 SNPs as good candidates that interact with the *HLA-DRB1* SE alleles  
344 in the risk of developing of ACPA-positive RA. From them, 13.5% are suggested SE-eQTLs in  
345 ACPA-positive RA individuals, indicating that the additive interactions detected may be a  
346 reflection of biological processes.

347 For instance, ACPA-positive RA patients who carry both the risk allele of the top interacting  
348 variant, the rs2476601 SNP, and the *HLA-DRB1* SE alleles, seem to have a higher expression  
349 of *PTPN22*, *HIPK1* and *CSDE1* genes in PBMCs (Figs. 4i to 4k). Intriguingly, the rs2476601  
350 SNP physically interacts with the *HIPK1* and *CSDE1* genes in certain type of immune cells,  
351 including CD4+ T cells, that in turn are known to be relevant in the pathogenesis of RA (28).  
352 Moreover, the T-box transcription factor Eomesodermin (*EOMES*) is part of 11 highlighted GO  
353 terms in our analysis (Supplementary Material Table S6). *EOMES* was annotated due to three  
354 SNPs in interaction with *HLA-DRB1* SE alleles (rs1506691, rs6804917 and rs12630663;  
355 Supplementary Material Tables S3 and S6), which interestingly also physically interact with  
356 *EOMES* in CD4+ and CD8+ T cells (<https://www.chicp.org>)(23, 25). *EOMES* is a transcription  
357 factor important for memory T cell formation and cytotoxic T cell differentiation (29). On the  
358 other hand, a study has demonstrated that MHC genotype, and *HLA-DRB1* in particular, has a  
359 key role in shaping the T cell receptor repertoire (30), evidence that goes in line with our  
360 suggestion that the observed statistical interactions are a reflection of functional implications.

361 Nevertheless, additional replication and interpretation of these interactions (pointed by the  
362 1,492 selected SNPs and the highlighted GO terms centered in the *HLA-DRB1* locus) in relation  
363 to biological processes will be the next step to further increase the etiological understanding of  
364 ACPA-positive RA.

365 The four most statistically significant SNP-gene pairs from the SE-eQTL analysis are new  
366 candidates in the genetic component of RA: rs10404242-*TLE6* (transducing like enhancer of  
367 split 6), rs5763638-*ZNRF3-AS1* (*ZNRF3* antisense RNA 1), rs28513183-*HSD11B1*  
368 (hydroxysteroid 11-beta dehydrogenase 1), and rs1781279-*MTPAP* (mitochondrial poly(A)  
369 polymerase). Particularly, the *HSD11B1* gene encodes the 11 $\beta$ -HSD1 enzyme involved in the  
370 biosynthesis of steroid hormones, related to an increase in the intracellular glucocorticoids  
371 levels. A knockdown *HSD11B1* mice model presents an increased acute inflammation after  
372 induction of experimental arthritis (31). Notably, all these SNPs show eQTL effects only in a  
373 context of the *HLA-DRB1* SE alleles, and further implication in ACPA-positive RA should be  
374 elucidated.

375

376 In conclusion, we used a new approach for the investigation of interactions at the genome-wide  
377 level in ACPA-positive RA, which led us to detect a significant enrichment of interactions  
378 between the *HLA-DRB1* SE alleles and associated with the disease SNPs in comparison to all  
379 other, non-associated SNPs. There is a visible reduction of the size of the effect of *HLA-DRB1*  
380 SE alleles on ACPA-positive RA risk when the risk alleles of the top interacting SNPs are  
381 discounted in a combined OR calculation (Fig 5). Our approach is potentially applicable to  
382 other autoimmune diseases or complex traits, where a single or a limited number of strong risk  
383 factors are observed. This approach could be used as a tool to explore the next level of  
384 complexity of multifactorial diseases, eventually allowing the detection of interconnected  
385 genetic variants in the risk for a phenotype, which could in turn contribute to a better  
386 understanding of disease mechanisms.

387

388

389



## 390 **Materials and Methods**

### 391 *Studied populations*

392 This project was based on GWAS data from two independent case control studies of RA, EIRA  
393 (5, 12, 15-18) and NARAC (5, 16, 19, 20). Briefly, the EIRA study recruited incident RA cases  
394 and healthy individuals selected from a national register that matched the cases by gender, age,  
395 and residence area (17, 18). Unrelated RA cases from multicase families from the United States  
396 were included in the NARAC study and matched with unrelated controls recruited from the  
397 New York Cancer Project (17, 19). In both studies, the RA patients were diagnosed based on  
398 the American College of Rheumatology (ACR) criteria from 1987 (32). Ethical approval was  
399 guaranteed for each study from the respective ethical committees and are in accordance with  
400 the Declaration of Helsinki. A total of 4,291 individuals were included in this study, with 1,151  
401 ACPA-positive RA cases and 1,079 healthy controls from EIRA and 867 ACPA-positive RA  
402 cases and 1,194 healthy individuals from NARAC (Table 1).

403

### 404 *HLA genotyping*

405 *HLA* typing in the EIRA study was made by sequence-specific primer polymerase chain  
406 reaction assay (SSP-PCR) (DR low-resolution kit; Olerup SSP, Saltsjöbaden, Sweden), and the  
407 PCR products were loaded into 2% agarose gels for electrophoresis. An interpretation table was  
408 used to determine the specific genotype according to the manufacturer's instructions (33). In  
409 the NARAC study, the *HLA* typing was also performed by SSP-PCR based methods as  
410 described elsewhere (34).

411 *HLA-DRB1* SE alleles included \*01 (except \*0103), \*04 (using high resolution data for \*0404,  
412 \*0405 and \*0408 when possible), and \*1001. A variable for the *HLA-DRB1* SE alleles was  
413 coded as NN, NY, and YY genotype like, where N and Y stand for “no” or “yes” based on the  
414 presence of the *HLA-DRB1* SE alleles.

415

416 *GWAS data, data filtering, and SNP grouping*

417 As described previously (5), the genotyping platforms used were HumanHap300 BeadChip and  
418 HumanHap550 BeadChip from Illumina® for EIRA and NARAC, respectively. The data were  
419 filtered for minor allele frequency (MAF) <1%, missing rate higher or equal to 5%, and p-  
420 values <0.001 for Hardy-Weinberg equilibrium (HWE). A principal component analysis (PCA)  
421 was performed using the EIGENSOFT (v6.1.1) ([https://www.hsph.harvard.edu/alkes-  
422 price/software/](https://www.hsph.harvard.edu/alkes-price/software/))(35) software to model the population stratification between the cases and  
423 controls after removing the extended *MHC* region and pruning the GWAS data sets (from non-  
424 imputed SNPs) based on the linkage disequilibrium (LD), excluding a SNP from a pair when  
425 their  $r^2$  was higher than 0.5. The 1000 Genomes Phase I ( $\alpha$ ) Europeans was used as a reference  
426 panel for imputation in IMPUTE2 (v2.3.0)  
427 ([https://mathgen.stats.ox.ac.uk/impute/impute\\_v2.html#home](https://mathgen.stats.ox.ac.uk/impute/impute_v2.html#home))(36) for EIRA and minimac  
428 (release stamp 2011-10-27) (<http://genome.sph.umich.edu/wiki/Minimac>)(37) for NARAC.  
429 Duplicated SNPs and SNPs with a low imputation score ( $R_{sq} < 0.5$ ) were removed; thereafter,  
430 the same filters of MAF, missing rate, and HWE, described above were applied again for both  
431 cohorts. The sex chromosomes were not included in the present study.

432

433 We removed the extended *MHC* region (chr6:27339429 to chr6:34586722, hg19) from our  
434 analyses, to exclude the influence of high LD and independent signals of association (38). A  
435 logistic regression model implemented in plink (v1.07)  
436 (<http://pngu.mgh.harvard.edu/~purcell/plink/>)(39) was used to estimate the association between  
437 each of the SNPs in GWAS and risk of ACPA-positive RA in EIRA and NARAC. Based on  
438 the nominal p-values of association, the SNPs were grouped into risk (p-values <0.05) or non-  
439 risk SNPs (p-values  $\geq 0.05$ ). The number of SNPs and percentages are shown in Fig 1b and

440 Table 2. Five percent of the EIRA imputed SNPs showed a nominal p-value of association less  
441 than 0.05, while 8.7% was observed in the NARAC. There was an overlap of 19,769 SNPs  
442 between the two studies.

443

#### 444 *Interaction Analysis*

445 After applying the filters mentioned above, we tested for additive interaction between the *HLA-*  
446 *DRB1* SE and each SNP from the EIRA and NARAC GWAS. The null hypothesis of the  
447 additive model assumes that there is additivity between the different sufficient causes for a  
448 phenotype, while the alternative hypothesis is assumed when departure from additivity is  
449 observed. The departure from additivity is estimated by the attributable proportion (AP) due to  
450 interaction using OR as the risk estimates(40) with the following equation:

$$451 \quad AP = (OR_{SE1SNP1} - OR_{SE1SNP0} - OR_{SE0SNP1} + 1) / OR_{SE1SNP1}$$

452 Where 1 and 0 refer to presence or absence of the risk factor/allele respectively, the ORs are  
453 calculated using SE0SNP0 as a reference group. A cut-off of five for each of the cell frequencies  
454 was applied in the interaction analysis. The gender and the first ten principal components from  
455 PCA were included as covariates in the model. AP value, its respective p-value and confidence  
456 interval (95%CI) were assessed using logistic regression by means of the program  
457 GEISA(v0.1.12) (<https://github.com/menzzana/geisa>)(11, 41). An update JAVA coded  
458 software of the previously published GEIRA algorithm (42). The numbers and the percentage  
459 of SNPs analyzed for each studied cohort are presented in Table 2.

460

#### 461 *Comparison of the distribution of AP p-values between the risk and non-risk groups of SNPs* 462 *and quality control approaches*

463 The distribution of AP p-values observed in the interaction analysis from the ACPA-positive  
464 RA risk SNPs was compared with the distribution of AP p-values observed in the interaction

465 analysis from the non-risk SNPs using the Kolmogorov-Smirnov (KS) test, implemented in the  
466 *stats* package of R software(v3.3.2) (<https://www.r-project.org/>)(43). The KS test statistic  
467 quantifies the maximum distance (D) between the two empirical cumulative distribution  
468 functions (ECDF) of the AP p-values from the risk and non-risk SNPs groups. The alternative  
469 hypothesis for the KS test was that the ECDF of the AP p-values from the risk SNPs is higher  
470 than the one for the non-risk SNPs influenced by an enrichment of small AP p-values due to  
471 the interaction between the *HLA-DRBI* SE alleles and the risk group of SNPs. The p-value  
472 obtained from this KS test was lower than the machine precision, represented as  $<2.2e-16$  or  
473 zero when the absolute p-value was asked. The  $<2.2e-16$  value corresponds to the default  
474 *double.eps* component of the numerical characteristics of R machine. Thus, the threshold for  
475 the permutations was set to  $2.2e-16$ . We permuted the category for the SNPs, of risk and non-  
476 risk ten thousand times, applying the KS test each time to identify the proportion of p-values  
477 from the KS tests that are less than the set threshold ( $<2.2e-16$ ). The percentage of the KS test  
478 results with p-values less than  $2.2e-16$  was 0, the maximum D value observed was  $6.1e-03$  in  
479 both analyzed cohorts. Likewise, we permuted the *HLA-DRBI* SE variable using non-imputed  
480 GWAS data and a smaller number of permutations ( $n=1000$ ), due to the computational  
481 limitations to calculate the interaction for each randomized SE variable against all SNPs in the  
482 GWAS. We applied the KS test to detect differences in the AP p-values' distribution for risk  
483 (nominal p-values of association  $<0.05$ ) versus non-risk (nominal p-values of association  $\geq 0.05$ )  
484 SNPs, each time the SE variable was randomized. The maximum D values observed were 0.05  
485 and 0.03 for EIRA and NARAC, respectively. The percentage of the KS test p-values from  
486 permutations less than  $2.2e-16$  were 0.1 for both EIRA and NARAC. Both types of  
487 permutations showed that less than 5% of the KS test will exhibit a p-value under  $2.2e-16$ ,  
488 strongly indicating that differences in the AP p-values distribution detected by the KS test from  
489 the original data are unlikely to be by chance.

490

491 In order to verify that the observed results were not due to statistical artifacts, we employed  
492 several approaches. First, we performed two types of permutations, for SE alleles and for the  
493 groups of SNPs, described in detail above. Second, we removed the SNPs from the *PTPN22*  
494 locus (chr1:113679091 to chr1:114679090, GRCh37/hg19) and applied the same workflow,  
495 from step one to nine of Fig 1b, to determine whether this locus significantly influences the  
496 observed enrichment due to the known gene-gene interaction between the rs2476601 variant (or  
497 SNPs in LD with this variant) and the *HLA-DRB1* SE alleles (7). Third, we used the above  
498 mentioned workflow, from step one to nine of Fig 1b, replacing the SE variable with the  
499 rs4507692 SNP as a negative control, since the rs4507692 SNP is not associated with RA but  
500 has the same MAF as the *HLA-DRB1* SE alleles (Table 1). Fourth, non-imputed GWAS data  
501 was used in the same methodological workflow, from step one to nine of Fig 1b, as well as  
502 removing data from the entire chromosome 6, to address possible inflation in the results due to  
503 a high LD with the *HLA-DRB1* SE alleles.

504

#### 505 *SNPs in interaction with SE between EIRA and NARAC*

506 We selected those variants with AP p-values  $< 0.05$  and same AP direction from both the EIRA  
507 and NARAC studies to evaluate their distribution across the genome and their possible  
508 implication in expression of the neighboring genes in the *HLA-DRB1* SE alleles context. We  
509 also applied FDR correction to the AP p-value of these 1,492 SNPs and considered significant  
510 q-values less than 0.05 (Supplementary Material Table S3).

511

#### 512 *Expression Quantitative Trait Loci (eQTL) in the context of the HLA-DRB1 SE alleles*

513 We evaluated whether the selected SNPs in interaction with the *HLA-DRB1* SE alleles were  
514 eQTLs in the *HLA-DRB1* SE alleles context for genes  $\pm 1$ Mbp around them (GRCh37/hg19)

515 assembly was used) using data from the PBMCs found in the COMBINE study (44). Briefly,  
516 the PBMCs from the RA patients were sampled at the Rheumatology Unit, Karolinska Institute,  
517 Stockholm-Sweden. RNA was purified from the PBMC samples and sequenced using Illumina  
518 HiSeq 2000 with TruSeq RNA sample preparation. DNA was genotyped using Illumina  
519 OmniExpress arrays (12v1) (44).

520 The eQTLs in the context of the *HLA-DRB1* SE alleles (SE-eQTLs) were analyzed in 97 ACPA-  
521 positive RA patients (69% females) that were undergoing a change or start of a new treatment  
522 regimen. In the analysis, the following formula was applied:

$$523 \text{ Expression} \sim \text{genotype} * \text{SE}$$

524 Where expression was the normalized gene expression values of a proximal gene, processed  
525 according to the edgeR package (v3.8.6)  
526 (<https://bioconductor.org/packages/release/bioc/html/edgeR.html>)(45, 46) i.e., the log<sub>2</sub>  
527 transformed and TMM-normalized (trimmed mean of M-values normalization method). The  
528 genotype was the numerically encoded genotype of the SNP (AA=0, AB=1, BB=2), and SE  
529 was the *HLA-DRB1* shared epitope alleles status as either true or false. Sex and treatment cohort  
530 were used as covariates and subject-ID as repeated measure, which was assumed as random  
531 intercept for each subject in the mixed-linear model (Data available on request). The calculation  
532 was performed using the mixed-linear model function in the nlme 3.1 package from  
533 R/Bioconductor (v3.3.2) (<https://www.bioconductor.org/>)(47). Low expressed genes (TMM-  
534 normalized < 1.4) were filtered out and 5% FDR(48) was considered.

535

### 536 *Gene ontology analysis*

537 In order to have a global view of the plausible biological pathways pointed by these SNPs in  
538 interaction with the *HLA-DRB1* SE alleles, gene ontology (GO) was assessed with GREAT  
539 (v3.0.0) (<http://bejerano.stanford.edu/great/public/html/index.php>)(49) to the list of 1,492

540 SNPs. Those SNPs have AP p-values <0.05 and same AP direction in both the EIRA and  
541 NARAC results (Supplementary Material Tables S6 and S7).

542

543

#### 544 **Acknowledgments**

545 We would like to thank all the patients and control individuals, involved in the EIRA, NARAC  
546 and COMBINE studies. Thanks to Magdalena Lindén, Tojo James, and Ingrid Kockum, whom  
547 provided us an updated version of *GEISA* and good discussions about this tool. Thanks to  
548 Soumya Raychouhndry and Peter Gregersen, that provided us with continuous help and  
549 supported us with data from NARAC. Thanks to Gilad Silberberg, who gave input in redaction  
550 and discussion of the results. We would also like to thank The National Genomics Infrastructure  
551 (NGI) in Sweden for providing computational resource for our study and Meena Strömquist for  
552 English language editing.

553 **Funding** This study was supported by the Swedish Council of Science (Vetenskapsrådet),  
554 Combine project (Vinnova), BeTheCure EU IMI program, and KGV foundation.

555

#### 556 **References**

557

558 1 Gregersen, P.K., Silver, J. and Winchester, R.J. (1987) The shared epitope hypothesis.  
559 An approach to understanding the molecular genetics of susceptibility to rheumatoid arthritis.  
560 *Arthritis Rheum*, **30**, 1205-1213.

561 2 Klareskog, L., Ronnelid, J., Lundberg, K., Padyukov, L. and Alfredsson, L. (2008)  
562 Immunity to citrullinated proteins in rheumatoid arthritis. *Annu Rev Immunol*, **26**, 651-675.

563 3 Eyre, S., Bowes, J., Diogo, D., Lee, A., Barton, A., Martin, P., Zhernakova, A., Stahl,  
564 E., Viatte, S., McAllister, K. *et al.* (2012) High-density genetic mapping identifies new  
565 susceptibility loci for rheumatoid arthritis. *Nat Genet*, **44**, 1336-1340.

566 4 McAllister, K., Eyre, S. and Orozco, G. (2011) Genetics of rheumatoid arthritis: GWAS  
567 and beyond. *Open Access Rheumatol*, **3**, 31-46.

568 5 Okada, Y., Wu, D., Trynka, G., Raj, T., Terao, C., Ikari, K., Kochi, Y., Ohmura, K.,  
569 Suzuki, A., Yoshida, S. *et al.* (2014) Genetics of rheumatoid arthritis contributes to biology and  
570 drug discovery. *Nature*, **506**, 376-381.

571 6 Viatte, S., Plant, D. and Raychaudhuri, S. (2013) Genetics and epigenetics of  
572 rheumatoid arthritis. *Nature reviews. Rheumatology*, **9**, 141-153.

573 7 Kallberg, H., Padyukov, L., Plenge, R.M., Ronnelid, J., Gregersen, P.K., van der Helm-  
574 van Mil, A.H., Toes, R.E., Huizinga, T.W., Klareskog, L., Alfredsson, L. *et al.* (2007) Gene-

- 575 gene and gene-environment interactions involving HLA-DRB1, PTPN22, and smoking in two  
576 subsets of rheumatoid arthritis. *Am J Hum Genet*, **80**, 867-875.
- 577 8 Lenz, T.L., Deutsch, A.J., Han, B., Hu, X., Okada, Y., Eyre, S., Knapp, M., Zhernakova,  
578 A., Huizinga, T.W., Abecasis, G. *et al.* (2015) Widespread non-additive and interaction effects  
579 within HLA loci modulate the risk of autoimmune diseases. *Nat Genet*, **47**, 1085-1090.
- 580 9 Seddighzadeh, M., Korotkova, M., Kallberg, H., Ding, B., Doha, N., Kurreeman, F.A.,  
581 Toes, R.E., Huizinga, T.W., Catrina, A.I., Alfredsson, L. *et al.* (2010) Evidence for interaction  
582 between 5-hydroxytryptamine (serotonin) receptor 2A and MHC type II molecules in the  
583 development of rheumatoid arthritis. *Eur J Hum Genet*, **18**, 821-826.
- 584 10 Shchetynsky, K., Protsyuk, D., Ronninger, M., Diaz-Gallo, L.M., Klareskog, L. and  
585 Padyukov, L. (2015) Gene-gene interaction and RNA splicing profiles of MAP2K4 gene in  
586 rheumatoid arthritis. *Clin Immunol*, **158**, 19-28.
- 587 11 Lekman, M., Hossjer, O., Andrews, P., Kallberg, H., Uvehag, D., Charney, D., Manji,  
588 H., Rush, J.A., McMahon, F.J., Moore, J.H. *et al.* (2014) The genetic interacting landscape of  
589 63 candidate genes in Major Depressive Disorder: an explorative study. *BioData Min*, **7**, 19.
- 590 12 Padyukov, L., Silva, C., Stolt, P., Alfredsson, L. and Klareskog, L. (2004) A gene-  
591 environment interaction between smoking and shared epitope genes in HLA-DR provides a  
592 high risk of seropositive rheumatoid arthritis. *Arthritis Rheum*, **50**, 3085-3092.
- 593 13 Rothman, K.J., Greenland, S. and Walker, A.M. (1980) Concepts of interaction. *Am J*  
594 *Epidemiol*, **112**, 467-470.
- 595 14 Rothman, K.J. (1976) Causes. *Am J Epidemiol*, **104**, 587-592.
- 596 15 Padyukov, L., Seielstad, M., Ong, R.T., Ding, B., Ronnelid, J., Seddighzadeh, M.,  
597 Alfredsson, L., Klareskog, L. and Epidemiological Investigation of Rheumatoid Arthritis study,  
598 g. (2011) A genome-wide association study suggests contrasting associations in ACPA-positive  
599 versus ACPA-negative rheumatoid arthritis. *Ann Rheum Dis*, **70**, 259-265.
- 600 16 Plenge, R.M., Cotsapas, C., Davies, L., Price, A.L., de Bakker, P.I., Maller, J., Pe'er, I.,  
601 Burt, N.P., Blumenstiel, B., DeFelice, M. *et al.* (2007) Two independent alleles at 6q23  
602 associated with risk of rheumatoid arthritis. *Nat Genet*, **39**, 1477-1482.
- 603 17 Plenge, R.M., Seielstad, M., Padyukov, L., Lee, A.T., Remmers, E.F., Ding, B., Liew,  
604 A., Khalili, H., Chandrasekaran, A., Davies, L.R. *et al.* (2007) TRAF1-C5 as a risk locus for  
605 rheumatoid arthritis--a genomewide study. *The New England journal of medicine*, **357**, 1199-  
606 1209.
- 607 18 Stolt, P., Bengtsson, C., Nordmark, B., Lindblad, S., Lundberg, I., Klareskog, L.,  
608 Alfredsson, L. and group, E.s. (2003) Quantification of the influence of cigarette smoking on  
609 rheumatoid arthritis: results from a population based case-control study, using incident cases.  
610 *Ann Rheum Dis*, **62**, 835-841.
- 611 19 Jawaheer, D., Lum, R.F., Amos, C.I., Gregersen, P.K. and Criswell, L.A. (2004)  
612 Clustering of disease features within 512 multicase rheumatoid arthritis families. *Arthritis*  
613 *Rheum*, **50**, 736-741.
- 614 20 Jawaheer, D., Seldin, M.F., Amos, C.I., Chen, W.V., Shigeta, R., Monteiro, J., Kern,  
615 M., Criswell, L.A., Albani, S., Nelson, J.L. *et al.* (2001) A genomewide screen in multiplex  
616 rheumatoid arthritis families suggests genetic overlap with other autoimmune diseases. *Am J*  
617 *Hum Genet*, **68**, 927-936.
- 618 21 Chang, M., Rowland, C.M., Garcia, V.E., Schrodi, S.J., Catanese, J.J., van der Helm-  
619 van Mil, A.H., Ardlie, K.G., Amos, C.I., Criswell, L.A., Kastner, D.L. *et al.* (2008) A large-  
620 scale rheumatoid arthritis genetic study identifies association at chromosome 9q33.2. *PLoS*  
621 *Genet*, **4**, e1000107.
- 622 22 El-Gabalawy, H.S., Robinson, D.B., Doha, N.A., Oen, K.G., Smolik, I., Elias, B., Hart,  
623 D., Bernstein, C.N., Sun, Y., Lu, Y. *et al.* (2011) Non-HLA genes modulate the risk of



- 624 rheumatoid arthritis associated with HLA-DRB1 in a susceptible North American Native  
625 population. *Genes Immun*, **12**, 568-574.
- 626 23 Javierre, B.M., Burren, O.S., Wilder, S.P., Kreuzhuber, R., Hill, S.M., Sewitz, S.,  
627 Cairns, J., Wingett, S.W., Varnai, C., Thiecke, M.J. *et al.* (2016) Lineage-Specific Genome  
628 Architecture Links Enhancers and Non-coding Disease Variants to Target Gene Promoters.  
629 *Cell*, **167**, 1369-1384 e1319.
- 630 24 Martin, P., McGovern, A., Orozco, G., Duffus, K., Yarwood, A., Schoenfelder, S.,  
631 Cooper, N.J., Barton, A., Wallace, C., Fraser, P. *et al.* (2015) Capture Hi-C reveals novel  
632 candidate genes and complex long-range interactions with related autoimmune risk loci. *Nat*  
633 *Commun*, **6**, 10069.
- 634 25 Schofield, E.C., Carver, T., Achuthan, P., Freire-Pritchett, P., Spivakov, M., Todd, J.A.  
635 and Burren, O.S. (2016) CHiCP: a web-based tool for the integrative and interactive  
636 visualization of promoter capture Hi-C datasets. *Bioinformatics*, **32**, 2511-2513.
- 637 26 Flanders, W.D. (2006) On the relationship of sufficient component cause models with  
638 potential outcome (counterfactual) models. *Eur J Epidemiol*, **21**, 847-853.
- 639 27 Forsberg, S.K., Bloom, J.S., Sadhu, M.J., Kruglyak, L. and Carlborg, O. (2017)  
640 Accounting for genetic interactions improves modeling of individual quantitative trait  
641 phenotypes in yeast. *Nat Genet*, in press.
- 642 28 Trynka, G., Sandor, C., Han, B., Xu, H., Stranger, B.E., Liu, X.S. and Raychaudhuri, S.  
643 (2013) Chromatin marks identify critical cell types for fine mapping complex trait variants. *Nat*  
644 *Genet*, **45**, 124-130.
- 645 29 Intlekofer, A.M., Takemoto, N., Wherry, E.J., Longworth, S.A., Northrup, J.T.,  
646 Palanivel, V.R., Mullen, A.C., Gasink, C.R., Kaeck, S.M., Miller, J.D. *et al.* (2005) Effector  
647 and memory CD8<sup>+</sup> T cell fate coupled by T-bet and eomesodermin. *Nat Immunol*, **6**, 1236-  
648 1244.
- 649 30 Sharon, E., Sibener, L.V., Battle, A., Fraser, H.B., Garcia, K.C. and Pritchard, J.K.  
650 (2016) Genetic variation in MHC proteins is associated with T cell receptor expression biases.  
651 *Nat Genet*, **48**, 995-1002.
- 652 31 Coutinho, A.E., Gray, M., Brownstein, D.G., Salter, D.M., Sawatzky, D.A., Clay, S.,  
653 Gilmour, J.S., Seckl, J.R., Savill, J.S. and Chapman, K.E. (2012) 11beta-Hydroxysteroid  
654 dehydrogenase type 1, but not type 2, deficiency worsens acute inflammation and experimental  
655 arthritis in mice. *Endocrinology*, **153**, 234-240.
- 656 32 Arnett, F.C., Edworthy, S.M., Bloch, D.A., McShane, D.J., Fries, J.F., Cooper, N.S.,  
657 Healey, L.A., Kaplan, S.R., Liang, M.H., Luthra, H.S. *et al.* (1988) The American Rheumatism  
658 Association 1987 revised criteria for the classification of rheumatoid arthritis. *Arthritis Rheum*,  
659 **31**, 315-324.
- 660 33 Lundstrom, E., Kallberg, H., Smolnikova, M., Ding, B., Ronnelid, J., Alfredsson, L.,  
661 Klareskog, L. and Padyukov, L. (2009) Opposing effects of HLA-DRB1\*13 alleles on the risk  
662 of developing anti-citrullinated protein antibody-positive and anti-citrullinated protein  
663 antibody-negative rheumatoid arthritis. *Arthritis Rheum*, **60**, 924-930.
- 664 34 Huizinga, T.W., Amos, C.I., van der Helm-van Mil, A.H., Chen, W., van Gaalen, F.A.,  
665 Jawaheer, D., Schreuder, G.M., Wener, M., Breedveld, F.C., Ahmad, N. *et al.* (2005) Refining  
666 the complex rheumatoid arthritis phenotype based on specificity of the HLA-DRB1 shared  
667 epitope for antibodies to citrullinated proteins. *Arthritis Rheum*, **52**, 3433-3438.
- 668 35 Price, A.L., Patterson, N.J., Plenge, R.M., Weinblatt, M.E., Shadick, N.A. and Reich,  
669 D. (2006) Principal components analysis corrects for stratification in genome-wide association  
670 studies. *Nat Genet*, **38**, 904-909.
- 671 36 Howie, B.N., Donnelly, P. and Marchini, J. (2009) A flexible and accurate genotype  
672 imputation method for the next generation of genome-wide association studies. *PLoS Genet*, **5**,  
673 e1000529.

- 674 37 Howie, B., Fuchsberger, C., Stephens, M., Marchini, J. and Abecasis, G.R. (2012) Fast  
675 and accurate genotype imputation in genome-wide association studies through pre-phasing. *Nat*  
676 *Genet*, **44**, 955-959.
- 677 38 Ding, B., Padyukov, L., Lundstrom, E., Seielstad, M., Plenge, R.M., Oksenberg, J.R.,  
678 Gregersen, P.K., Alfredsson, L. and Klareskog, L. (2009) Different patterns of associations with  
679 anti-citrullinated protein antibody-positive and anti-citrullinated protein antibody-negative  
680 rheumatoid arthritis in the extended major histocompatibility complex region. *Arthritis Rheum*,  
681 **60**, 30-38.
- 682 39 Purcell, S., Neale, B., Todd-Brown, K., Thomas, L., Ferreira, M.A., Bender, D., Maller,  
683 J., Sklar, P., de Bakker, P.I., Daly, M.J. *et al.* (2007) PLINK: a tool set for whole-genome  
684 association and population-based linkage analyses. *Am J Hum Genet*, **81**, 559-575.
- 685 40 Greenland, S. and Rothman, K.J. (2008) Rothman, K.J. and Greenland, S. (eds.), In  
686 *Modern Epidemiology*. Lippincott Williams & Wilkins, Philadelphia, Vol. 1, pp. 329-342.
- 687 41 Zazzi, H. (2014), in press.
- 688 42 Ding, B., Kallberg, H., Klareskog, L., Padyukov, L. and Alfredsson, L. (2011) GEIRA:  
689 gene-environment and gene-gene interaction research application. *Eur J Epidemiol*, **26**, 557-  
690 561.
- 691 43 RCoreTeam. (2016) R: A language and environment for statistical computing., in press.
- 692 44 Folkersen, L., Brynedal, B., Diaz-Gallo, L.M., Ramskold, D., Shchetynsky, K.,  
693 Westerlind, H., Sundstrom, Y., Schepis, D., Hensvold, A., Vivar, N. *et al.* (2016) Integration  
694 of known DNA, RNA and protein biomarkers provides prediction of anti-TNF response in  
695 rheumatoid arthritis: results from the COMBINE study. *Molecular medicine*, **22**.
- 696 45 McCarthy, D.J., Chen, Y. and Smyth, G.K. (2012) Differential expression analysis of  
697 multifactor RNA-Seq experiments with respect to biological variation. *Nucleic Acids Res*, **40**,  
698 4288-4297.
- 699 46 Robinson, M.D., McCarthy, D.J. and Smyth, G.K. (2010) edgeR: a Bioconductor  
700 package for differential expression analysis of digital gene expression data. *Bioinformatics*, **26**,  
701 139-140.
- 702 47 Pinheiro J, B.D., DebRoy S, Sarkar D and R Core Team. (2017), in press.
- 703 48 Benjamini, Y. and Hochberg, Y. (1995) Controlling the False Discovery Rate - a  
704 Practical and Powerful Approach to Multiple Testing. *J Roy Stat Soc B Met*, **57**, 289-300.
- 705 49 McLean, C.Y., Bristor, D., Hiller, M., Clarke, S.L., Schaar, B.T., Lowe, C.B., Wenger,  
706 A.M. and Bejerano, G. (2010) GREAT improves functional interpretation of cis-regulatory  
707 regions. *Nat Biotechnol*, **28**, 495-501.
- 708 50 Hindorff, L.A., Sethupathy, P., Junkins, H.A., Ramos, E.M., Mehta, J.P., Collins, F.S.  
709 and Manolio, T.A. (2009) Potential etiologic and functional implications of genome-wide  
710 association loci for human diseases and traits. *Proc Natl Acad Sci U S A*, **106**, 9362-9367.
- 711 51 Welter, D., MacArthur, J., Morales, J., Burdett, T., Hall, P., Junkins, H., Klemm, A.,  
712 Flicek, P., Manolio, T., Hindorff, L. *et al.* (2014) The NHGRI GWAS Catalog, a curated  
713 resource of SNP-trait associations. *Nucleic Acids Res*, **42**, D1001-1006.
- 714 52 EMBL-EBI. (2017), Vol. 2017.
- 715 53 Pruim, R.J., Welch, R.P., Sanna, S., Teslovich, T.M., Chines, P.S., Gliedt, T.P.,  
716 Boehnke, M., Abecasis, G.R. and Willer, C.J. (2010) LocusZoom: regional visualization of  
717 genome-wide association scan results. *Bioinformatics*, **26**, 2336-2337.
- 718 54 Clark, C.P.F., M.; Welch, R.; VandeHaar, P.; Taliun, D.; Boehnke, M.; Abecasis, G. .  
719 (2016), in press.

720

721

## 722 **Figure Captions**

723 **Fig 1. (a) Genetic variants associated with ACPA-positive RA.** This plot represents the  
724 association signals (p-values < 1.0e-05) from different GWAS in ACPA-positive RA, taken  
725 from the NHGRI-EBI GWAS catalog (<https://www.ebi.ac.uk/gwas/home>) (50-52). The x-axis  
726 shows the physical positions for the chromosomes of the human genome including chromosome  
727 X (marked as 23). The y-axis represents the OR value observed for each SNP in different  
728 studies. As examples, some polymorphisms are pointed out together with the OR observed for  
729 the *HLA-DRB1* SE alleles in EIRA and NARAC studies. **(b) Methodology work flow.** The  
730 workflow applied in the present study. **[a]** The same workflow was applied using only  
731 genotyping data (non-imputed) from both cohorts. In an independent analysis, all genetic  
732 variations from the *MHC* locus or from the entire chromosome 6 were removed from the  
733 analysis (Supplementary Material Table S2). **[b]** An alternative step was included at this point  
734 of the workflow. The *PTPN22* locus (chr1:113679091 to chr1:114679090) was removed from  
735 the analysis due to the previously reported interaction in RA between the non-synonymous  
736 variant rs2476601 in the *PTPN22* gene and the *HLA-DRB1* SE alleles (7). **[c]** The gender and  
737 the first ten principal components from PCA were included as covariates in the model. The  
738 interaction test was only applied when at least 5 individuals were present in each combined  
739 category of the calculation. AP value, its respective p-value and confidence interval (95%CI)  
740 were assessed using logistic regression by means of the program GEISA  
741 (<https://github.com/menzzana/geisa>)(11, 40). **[d]** In order to verify that the observed results  
742 were not due to statistical artifacts, we employed several approaches. First, we permuted the  
743 category of risk and non-risk for the observed AP p-values ten thousand times, applying the KS  
744 test each time to identify the proportion of p-values from the KS tests that are less than the set  
745 threshold (<2.2e-16). The percentage of the KS test results with p-values less than 2.2e-16 was  
746 0, the maximum D value observed was 6.1e-03 in both analyzed cohorts. Likewise, we  
747 permuted the *HLA-DRB1* SE variable using non-imputed GWAS data, with a smaller number  
748 of permutations (n=1000) due to the computational limitations, to calculate the interaction for  
749 each randomized SE variable against all SNPs in the GWAS. We applied the KS test to detect  
750 differences in the AP p-values' distribution for risk (nominal p-values of association <0.05)  
751 versus non-risk (nominal p-values of association  $\geq 0.05$ ) SNPs, each time the SE variable was  
752 randomized. The maximum D values observed were 0.05 and 0.03 for EIRA and NARAC,  
753 respectively. The percentage of the KS test p-values from permutations less than 2.2e-16 were  
754 0.1 for both EIRA and NARAC. Both types of permutations showed that less than 5% of the  
755 KS test will exhibit a p-value under 2.2e-16, strongly indicating that differences in the AP p-  
756 values distribution detected by the KS test from the original data are unlikely to be by chance.  
757 Secondly, as it is mentioned before, we tested the same workflow after removing the *PTPN22*  
758 locus, to test whether the enrichment of interactions observed was significantly influenced by  
759 these variants. Third, we applied the same workflow up to this point, replacing the SE variable  
760 with the rs4507692 SNP as a negative control, since the rs4507692 SNP is not associated with  
761 ACPA-positive RA but has the same MAF as the *HLA-DRB1* SE alleles. Fourth, as it is  
762 mentioned before, non-imputed GWAS data were used in the same methodological workflow,  
763 as well as removing data from the entire chromosome 6, to address possible inflation in the  
764 results due to a high LD with the *HLA-DRB1* SE alleles.  
765 Abbreviations: SE1SNP1: presence of the *HLA-DRB1* SE alleles and the risk allele from the  
766 SNP, SE1SNP0: presence of the *HLA-DRB1* SE alleles and absence of the risk allele from the  
767 SNP, SE0SNP: absence of the *HLA-DRB1* SE alleles and presence of the risk allele from the  
768 SNP, ACPA-positive RA – anti-citrullinated protein antibody positive rheumatoid arthritis, SE:  
769 share epitope, GWAS – genome-wide association study, NHGRI – National Human Research  
770 Institute, EBI – European Bioinformatics Institute, OR - odds ratio, EIRA – epidemiological  
771 investigation of rheumatoid arthritis, NARAC – North American rheumatoid arthritis

772 consortium, *MHC* locus – major histocompatibility locus, PTPN22 – gene abbreviation, PCA  
773 – principal component analysis, KS – Kolmogorov-Smirnov test, MAF – minor allele  
774 frequency, LD – linkage disequilibrium.

775

776 **Fig 2. Comparison of the distribution of p-values for attributable proportion in EIRA and**  
777 **NARAC studies for interaction tests between the *HLA-DRB1* SE alleles and genetic**  
778 **variants. (a)** Density plot of AP p-values for the interaction between the *HLA-DRB1* SE alleles  
779 and the risk group of SNPs (nominal p-value of association <0.05) or **(b)** non-risk group of  
780 SNPs (nominal p-value of association  $\geq 0.05$ ) in the EIRA study. **(c)** The respective ECDF plot  
781 of the AP p-values distribution of risk (red line) or non-risk (blue line) SNPs in interaction with  
782 the *HLA-DRB1* SE alleles (KS test,  $D=0.35$ , p-value <2.2e-16; Table 2). We tested for  
783 differences in the AP p-values distribution on the fraction that could be considered as significant  
784 interactions with the *HLA-DRB1* SE alleles (AP p-value <0.05). **(d)** Density plot for the AP p-  
785 values from the interaction tests between the risk SNPs and the *HLA-DRB1* SE alleles or, **(e)**  
786 between the non-risk SNPs and the *HLA-DRB1* SE alleles in the EIRA study. **(f)** ECDF of the  
787 fraction of AP p-values distribution corresponding to <0.05 in the EIRA study (KS test, test  
788  $D=0.26$ , p-value >2.2e-16). Similar results were observed from the NARAC study, an  
789 independent replication cohort: **(g)** Density plot of the AP p-values for the interaction between  
790 the *HLA-DRB1* SE alleles and the risk group of SNPs or **(h)** non-risk group of SNPs. **(i)** The  
791 respective, ECDF plot from the NARAC study (KS test,  $D=0.25$ , p-value <2.2e-16, Table 1).  
792 **(j)** Density plot of the fraction of the AP p-values distribution of less than 0.05 from the  
793 interactions between the *HLA-DRB1* SE alleles and the risk SNPs or **(k)** non-risk SNPs. **(l)** The  
794 ECDF plot from this fraction of the AP p-values distribution (KS test,  $D=0.17$ , p-value >2.2e-  
795 16).

796 Abbreviations: EIRA – epidemiological investigation of rheumatoid arthritis, NARAC – North  
797 American rheumatoid arthritis consortium, AP – attributable proportion due to interaction,  
798 ECDF - Empirical cumulative distribution function, KS test – Kolmogorov – Smirnov test.

799

800 **Fig 3. Three-factor's OR calculation: the *HLA-DRB1* SE alleles and the two most**  
801 **significant SNPs in interaction with each cohort.** On the x-axis – the combinations of  
802 presence or absence of risk alleles for allelic or dominant models. On the y-axis – the combined  
803 ORs with 95% CI of *HLA-DRB1* SE alleles (presence - Y, or absence - N) and the most  
804 significant SNPs in interaction from each cohort. Panel **(a)** shows data from the EIRA study,  
805 where the rs2077507(A>G) and rs1004664(T>G) SNPs are represented. The YGG alleles  
806 combination represents all risk alleles. The rs2077507 SNP is in significant interaction with the  
807 *HLA-DRB1* SE alleles (AP=0.57 95%CI=0.47-0.67, p-value <1e-16). Similarly, rs1004664 is  
808 in significant interaction with the *HLA-DRB1* SE alleles (AP=0.46 95%CI=0.34-0.57, p-  
809 value=6e-14) in the EIRA study. Panel **(b)** shows data from the NARAC study, where the  
810 chr14:97082932(C>T) and rs56130735(G>A) variants are represented. The YTA alleles  
811 combination represents all risk alleles. The chr14:97082932 variant shows significant  
812 interaction with the *HLA-DRB1* SE alleles (AP=0.54 95%CI=0.34-0.75, p-value=2.1e-07) as  
813 well as rs56130735 (AP=0.37 95%CI=0.19-0.54, p-value=4.7e-05) in the NARAC study.

814 Abbreviations: OR - odds ratio, CI – confidence intervals, EIRA – epidemiological  
815 investigation of rheumatoid arthritis, NARAC – North American rheumatoid arthritis  
816 consortium, AP – attributable proportion due to interaction.

817

818 **Fig 4. Selected SNPs from both studied cohorts with AP p-value <0.05 and same direction**  
819 **of AP for the additive interaction test with the *HLA-DRB1* SE alleles.** The circos plots for  
820 **(a)** the EIRA study and **(b)** the NARAC study represent with triangles each of the 1,492 selected  
821 SNPs in additive interaction with the *HLA-DRB1* SE alleles. The outermost track of the circos  
822 plots is the cytoband for 22 human chromosomes. The y-axis of the second track is the negative

823 logarithm of the AP p-values due to additive interaction with the *HLA-DRB1* SE alleles. In the  
824 third track, the y-axis corresponds to the AP value. The internal connector lines highlight the  
825 interactions that exhibited an AP p-value<1e-03. (c-d) Representation of locus at chromosome  
826 9q33 centered on rs7033753 SNP for (c) the EIRA study and (d) the NARAC study. The  
827 rs7033753 is in LD ( $r^2>0.6$ ) with several other variants in interaction with the *HLA-DRB1* SE  
828 alleles in both the studies. (e-f) The genotype of rs7033753 variant is significantly correlated  
829 with the expression of (e) *GSN-ASI* and (f) *PHF19* genes in PBMCs from the ACPA-positive  
830 RA patients when stratification by the *HLA-DRB1* SE allelic status is considered (SE-eQTL  
831 FDR q-value=0.04 for both SNP-gene pairs). (g-h) Representation of locus at chromosome  
832 1p13 centered on rs2476601 SNP for (c) the EIRA study and (d) the NARAC study. (i-k) The  
833 rs2476601 genotype in stratification by the *HLA-DRB1* SE allelic status significantly correlates  
834 with (i) *HIPK1*, (j) *PTPN22*, and (k) *CSDE1* genes expression in PBMCs from the ACPA-  
835 positive RA patients (SE-eQTL FDR q-value=0.04). Panels (c), (d), (g) and (h) were done using  
836 LocusZoom(v0.4.8) (<http://locuszoom.org/genform.php?type=yourdata>)(53, 54).  
837 Abbreviations: EIRA – epidemiological investigation of rheumatoid arthritis, NARAC – North  
838 American rheumatoid arthritis consortium, AP – attributable proportion due to interaction, LD  
839 – linkage disequilibrium, PBMCs – peripheral blood mononuclear cells, ACPA-positive RA –  
840 anti-citrullinated protein antibodies positive rheumatoid arthritis, SE-eQTL – expression  
841 quantitative trait loci in shared epitope context, FDR – false discovery rate. *GSN-ASI*, *PHF19*,  
842 *HIPK1*, *PTPN22*, and *CSDE1* are abbreviations for the genes.

843  
844 **Fig 5. Three-factor's OR calculation: the *HLA-DRB1* SE alleles and two of the replicated**  
845 **SNPs in significant interaction.** On the x-axis – the combinations of presence or absence of  
846 risk alleles for allelic or dominant models. On the y-axis – the combined ORs with 95% CI of  
847 *HLA-DRB1* SE alleles (presence - Y, or absence - N), the rs2476601(G>A, in the 1p13 locus)  
848 SNP and the rs10739581(T>C, in the 9q33 locus). The YAC allelic combination is a risk factor  
849 to develop ACPA-positive RA in the study populations. Panel (a) shows data from EIRA study,  
850 where both rs2476601 and rs10739581 are in significant interaction with the *HLA-DRB1* SE  
851 alleles after FDR correction (AP=0.45 95%CI=0.31-0.60, p-value=4.3e-10, FDR q-value=5.2e-  
852 5 and AP=0.40 95%CI=0.24-0.57, p-value=1.4e-6, FDR q-value=0.04, respectively). Similarly,  
853 panel (b) shows data from NARAC study for the combined OR of *HLA-DRB1* SE alleles,  
854 rs2476601 and rs10739581 variants. The rs2476601 SNP at 1p13 locus and rs10739581 at 9q33  
855 locus are in significant interaction with *HLA-DRB1* SE alleles after FDR correction in the  
856 NARAC study (AP=0.41 95%CI=0.23-0.6, p-value=1.1e-5, FDR q-value=0.04 and AP=0.43  
857 95%CI=0.28-0.6, p-value=2.1e-8, FDR q-value=2.5e-4, respectively).

858 Abbreviations: OR - odds ratio, CI – confidence intervals, ACPA-positive RA – anti-  
859 citrullinated protein antibodies positive rheumatoid arthritis, EIRA – epidemiological  
860 investigation of rheumatoid arthritis, NARAC – North American rheumatoid arthritis  
861 consortium, AP – attributable proportion due to interaction, FDR – false discovery rate.

862

### 863 **Supplementary Material**

864 **Fig S1. Comparison of the distribution of p-values for attributable proportion in the EIRA**  
865 **and NARAC studies for interaction tests between the SNP rs4507692 and RA risk or non-**  
866 **risk SNPs.** The rs4507692 is a variant that has the same MAF as the *HLA-DRB1* SE alleles but  
867 is not associated with ACPA-positive RA. (a) Density plot of the AP p-values for the interaction  
868 between rs4507692 and the ACPA-positive RA risk group of SNPs (raw p-value of association  
869 <0.05) or (b) non-risk group of SNPs (raw p-value of association  $\geq 0.05$ ) in the EIRA study. (c)  
870 The respective ECDF plot of the AP p-values distribution of risk (red line) or non-risk (blue  
871 line) SNPs in interaction with the rs4507692 (KS test, D=0.018, p-value=1.4e-43, (Table 1 and  
872 Supplementary Material Tables S1 and S2). We tested for differences in the AP p-values

873 distribution on the fraction that could be considered as significant interactions with rs4507692  
874 (AP p-value <0.05). **(d)** Density plot for the AP p-values from the interaction tests between the  
875 risk SNPs and rs4507692 or, **(e)** between the non-risk SNPs and rs4507692 SNP in the EIRA  
876 study. **(f)** ECDF of the fraction of the AP p-values distribution corresponding to <0.05 in the  
877 EIRA study (KS test, D=0.009 and p-value= 0.50). Similar results were observed from the  
878 NARAC study, an independent replication cohort: **(g)** Density plot of the AP p-values for the  
879 interaction between the rs4507692 and the risk group of SNPs or **(h)** the non-risk group of  
880 SNPs. **(i)** The respective, ECDF plot from the NARAC study (KS test, D=0.001, p-value=  
881 0.458, Supplementary Material Table S2). **(j)** Density plot of the fraction of the AP p-values of  
882 less than 0.05 from the interactions between the rs4507692 and the risk SNPs or **(k)** the non-  
883 risk SNPs. **(l)** The ECDF plot from this fraction of the AP p-values distribution (KS test, D=  
884 0.027 and p-value=1.29e-07) is not significant since it is higher than the significant threshold  
885 set for the KS-test of 2.2e-16.

886 Abbreviations: EIRA – epidemiological investigation of rheumatoid arthritis, NARAC – North  
887 American rheumatoid arthritis consortium, ACPA-positive RA – anti-citrullinated protein  
888 antibodies positive rheumatoid arthritis, AP – attributable proportion due to interaction, ECDF  
889 - Empirical cumulative distribution function, KS test – Kolmogorov – Smirnov test.

890  
891 **S2 Figure. ECDF for the KS test between the AP p-values of the risk SNPs test for**  
892 **interaction with the *HLA-DRB1* SE alleles (upper line in light red) or with the rs4507692**  
893 **variant (bottom line in dark red). (a) in EIRA (KS test, D=0.352, p-value< 2.2e-16) and (b)**  
894 **in NARAC (KS test, D=0.258, p-value<2.2e-16).**

895 Abbreviations: ECDF - Empirical cumulative distribution function, KS test – Kolmogorov –  
896 Smirnov test, AP – attributable proportion due to interaction.

897  
898 **S3 Figure. The four most significant SE-eQTLs.** SNPs in interaction with the *HLA-DRB1* SE  
899 alleles from the EIRA and NARAC studies were selected (AP p-value <0.05 and same direction  
900 of AP in both studies) and evaluated as cis-eQTL in the presence or absence of the *HLA-DRB1*  
901 SE alleles (SE-eQTL) in PBMCs from the ACPA-positive RA patients (COMBINE study(44)).  
902 We observed that 201 SNPs in interaction with the *HLA-DRB1* SE alleles are eQTLs when the  
903 SE allelic status is considered (FDR q-value<0.05). The top four SNP-gene pairs are  
904 represented in the plots: **(a)** rs10404242-*TLE6*, SNP-gene pair (SE-eQTL p-value=6.7e-4, FDR  
905 q-value=0.04). The rs10404242 variant is in interaction with the *HLA-DRB1* SE alleles in the  
906 EIRA study (AP= 0.25, 95%CI=0.09-0.42, AP p-value=0.002) and in the NARAC study  
907 (AP=0.23 95%CI=0.04-0.43 AP p-value=0.02). **(b)** rs5763638-*ZNRF3-AS1*, SNP-gene pair  
908 (SE-eQTL p-value=1.9e-3, FDR q-value=0.04). The rs5763638 variant is in interaction with  
909 the *HLA-DRB1* SE alleles in the EIRA study (AP=0.19, 95%CI=0.013-0.37, AP p-value=0.03)  
910 and in the NARAC study (AP=0.22, 95%CI=0.02-0.44, AP p-value=0.03). **(c)** rs28513183-  
911 *HSD11B1*, SNP-gene pair (SE-eQTL p-value=2e-3, FDR q-value=0.04). The rs28513183  
912 variant is in interaction with the *HLA-DRB1* SE alleles in the EIRA study (AP=0.22,  
913 95CI=0.02-0.44, AP p-value=0.03) and in the NARAC study (AP=0.27, 95CI=0.07-0.49, AP  
914 p-value=9.4e-3). **(d)** rs1781279-*MTPA*, SNP-gene pair (SE-eQTL p-value=2.9e-3, FDR q-  
915 value=0.04). The rs1781279 variant is in interaction with the *HLA-DRB1* SE alleles in the EIRA  
916 study (AP=0.19, 95%CI=0.02-0.37, AP p-value=0.03) and in the NARAC study (AP=0.24,  
917 95%CI=0.05-0.44, AP p-value=0.01).

918 Abbreviations: SE-eQTL – expression quantitative trait loci in shared epitope context, EIRA –  
919 epidemiological investigation of rheumatoid arthritis, NARAC – North American rheumatoid  
920 arthritis consortium, AP – attributable proportion due to interaction, PBMCs – peripheral blood  
921 mononuclear cells, ACPA-positive RA – anti-citrullinated protein antibodies positive

922 rheumatoid arthritis, FDR – false discovery rate. *TLE6*, *ZNRF3-AS1*, *HSD11B1* and *MTPA* are  
923 abbreviations for the genes.  
924

925 **Table S1.** The Kolmogorov-Smirnov (KS) test for AP p-values distributions of the interaction  
926 analysis with the rs4507692 SNP <sup>a, b</sup> in EIRA and NARAC imputed data.  
927

928 **Table S2.** The Kolmogorov-Smirnov (KS) test for AP p—values distributions of the interaction  
929 analysis in EIRA and NARAC GWAS (non-imputed data).  
930

931 **Table S3.** Selected SNPs in interaction with the *HLA-DRB1* SE alleles from EIRA and  
932 NARAC. The SNPs were selected whether they exhibited AP p-values < 0.05 and the same  
933 direction of AP in both studies. <sup>a</sup> The interaction tests were done using the risk allele from the  
934 tested SNPs. <sup>b</sup> 1 refers to the risk factor or alleles. Complementary 0 refers to the opposite no-  
935 risk factor or allele.  
936

937 **Table S4.** Distribution across the human genome of the selected SNPs in interaction with the  
938 *HLA-DRB1* SE alleles.  
939

940 **Table S5.** SE-eQTLs observed in ACPA-positive RA patients. Only selected SNPs in  
941 interaction with the *HLA-DRB1* SE alleles were tested.  
942

943 **Table S6.** Gene ontology (GO) terms obtained using 1,492 selected SNPs in interaction with  
944 the *HLA-DRB1* SE alleles.  
945

946 **Table S7.** Setting used, input, output data, and results from the gene ontology (GO) analyses.

# Figure 1

## Genetic Variants Associated with ACPA-positive RA

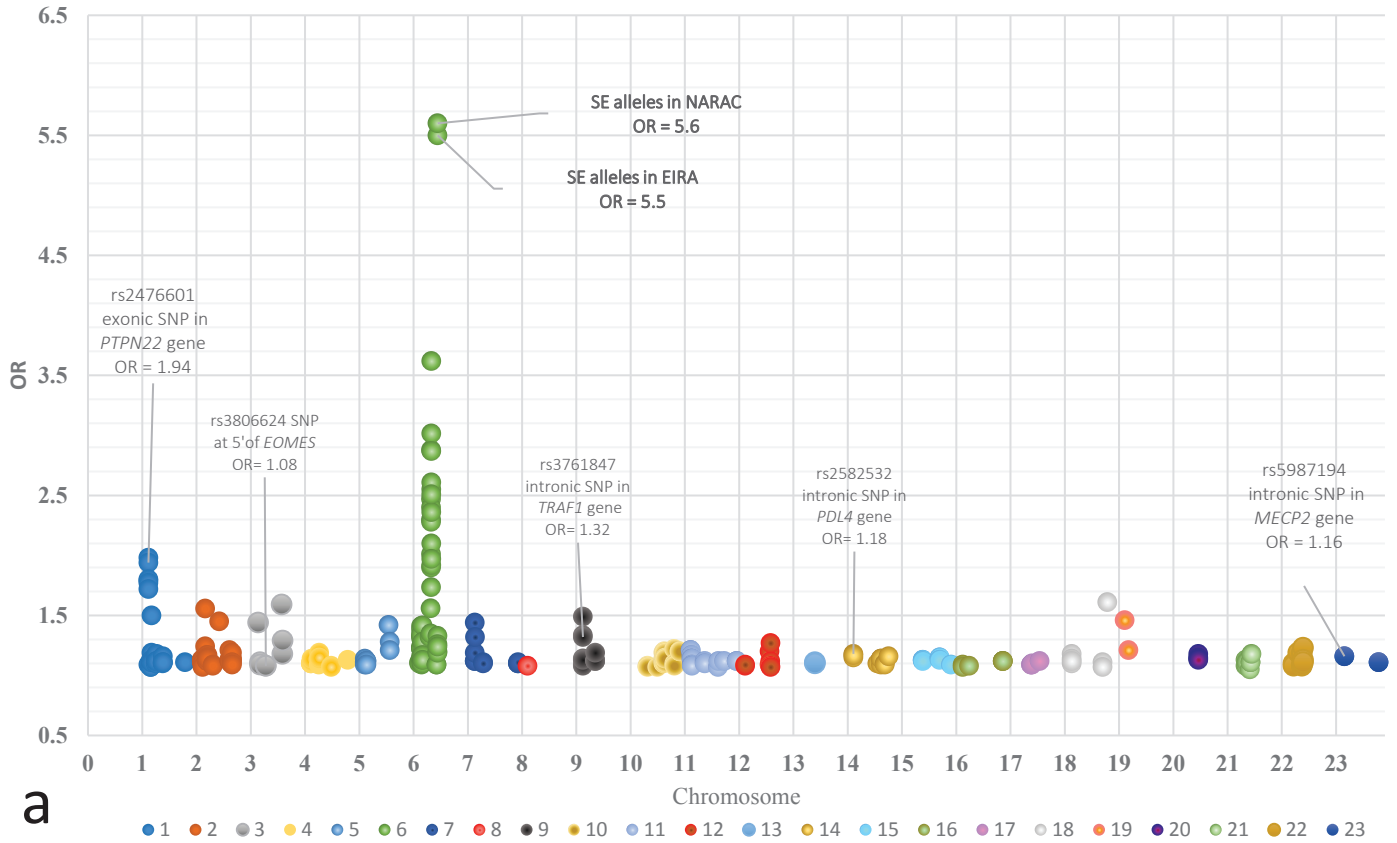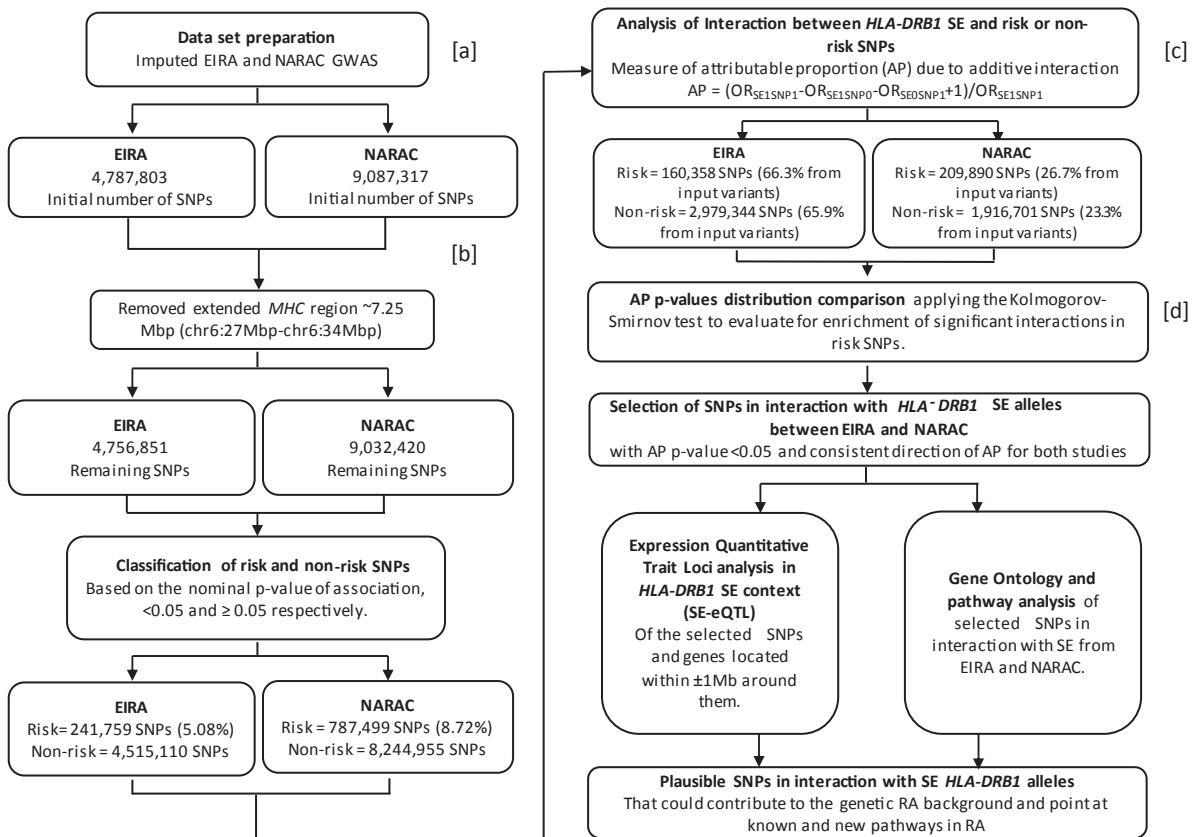

**b**



# Figure 2

## AP p-value distribution

### EIRA

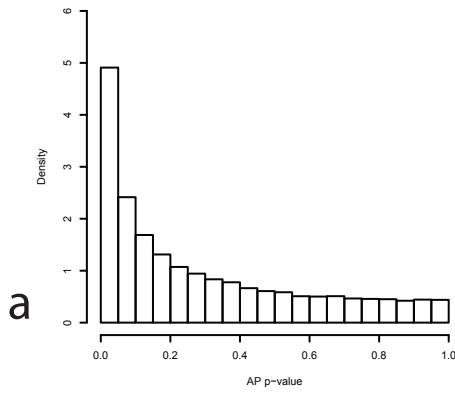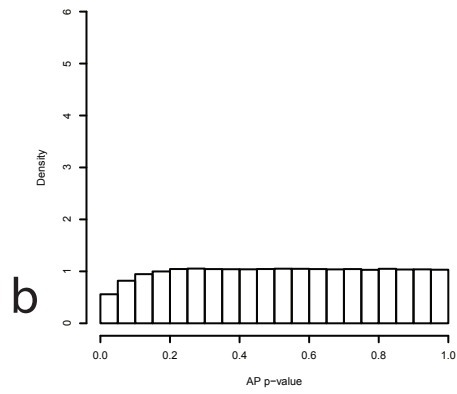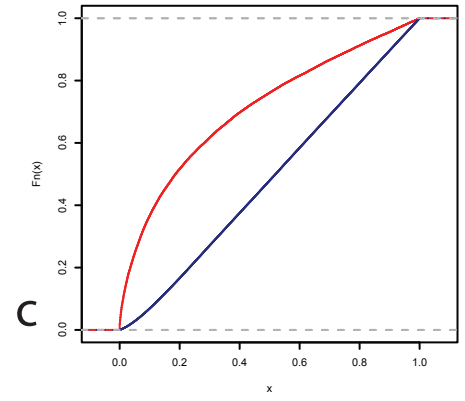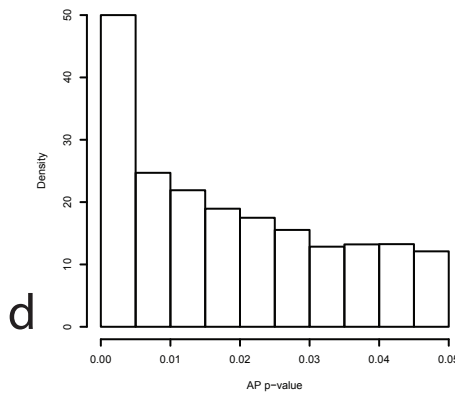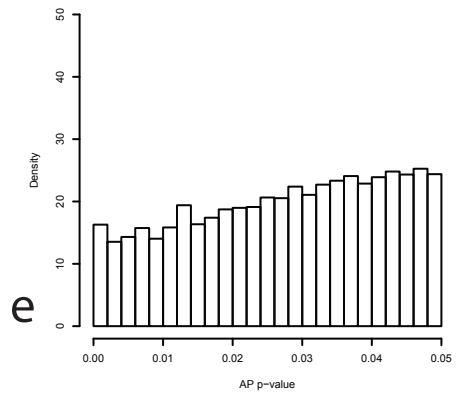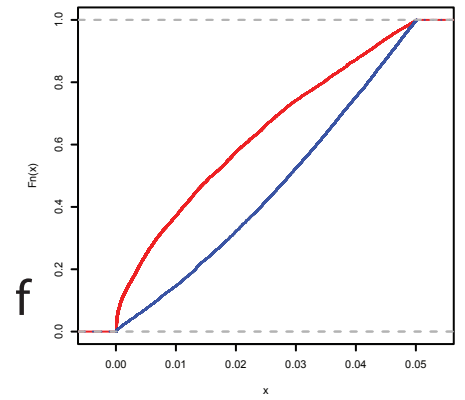

### NARAC

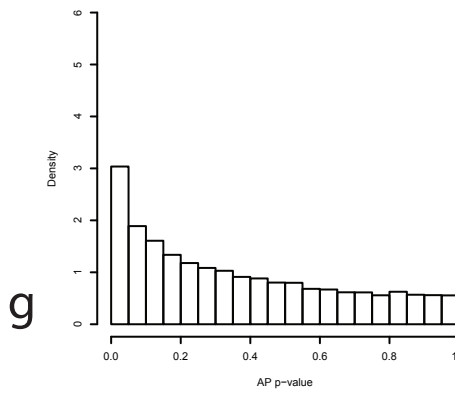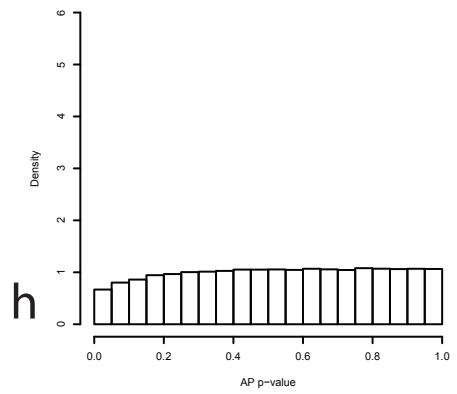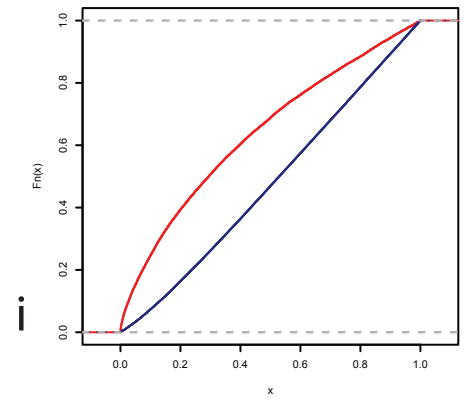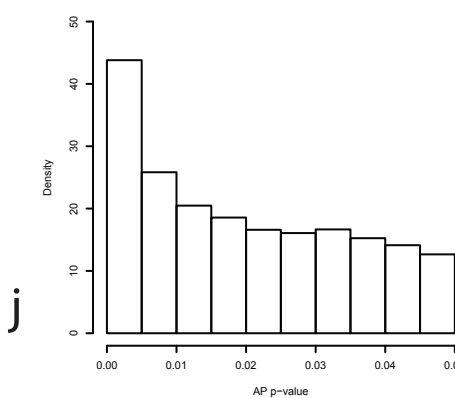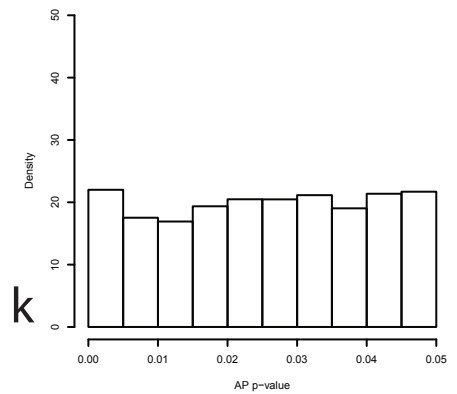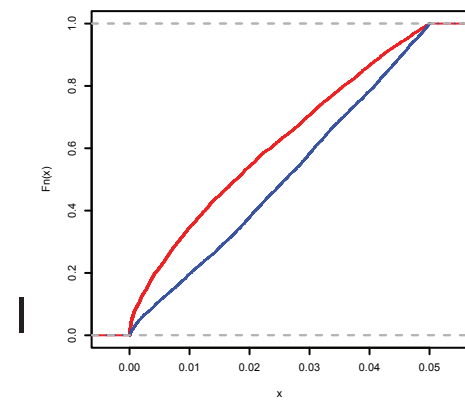

# Figure 3

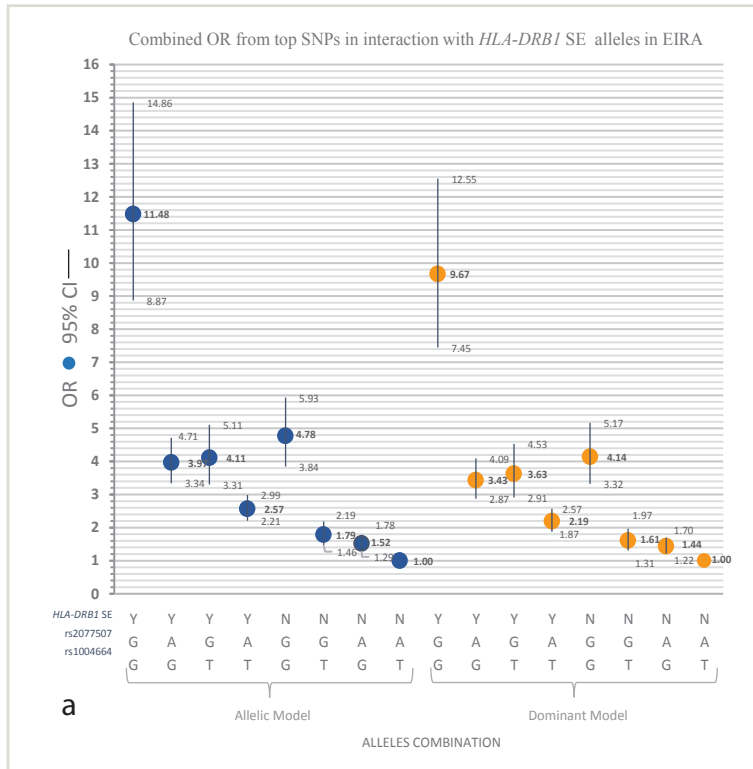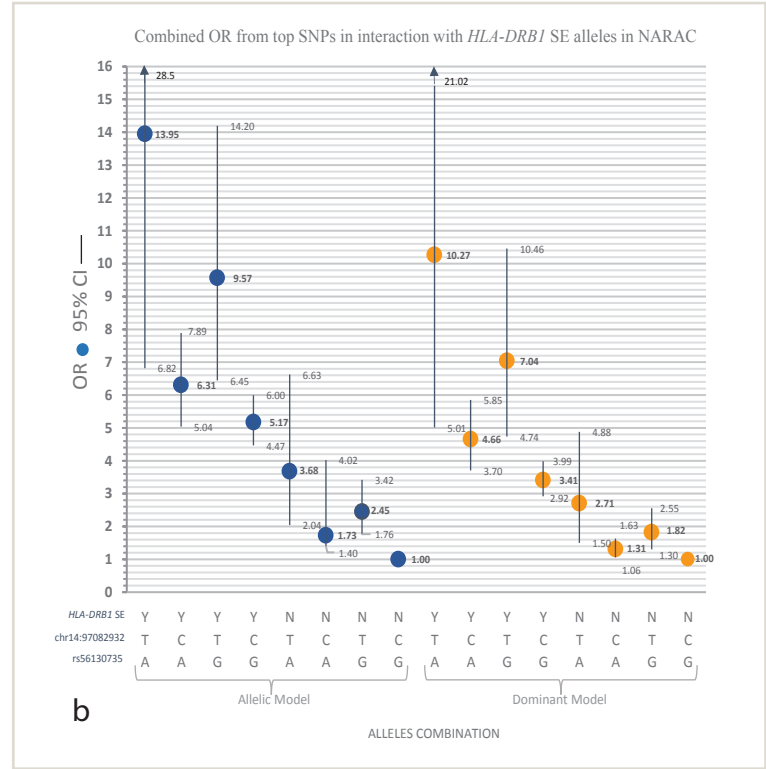

# Figure 4

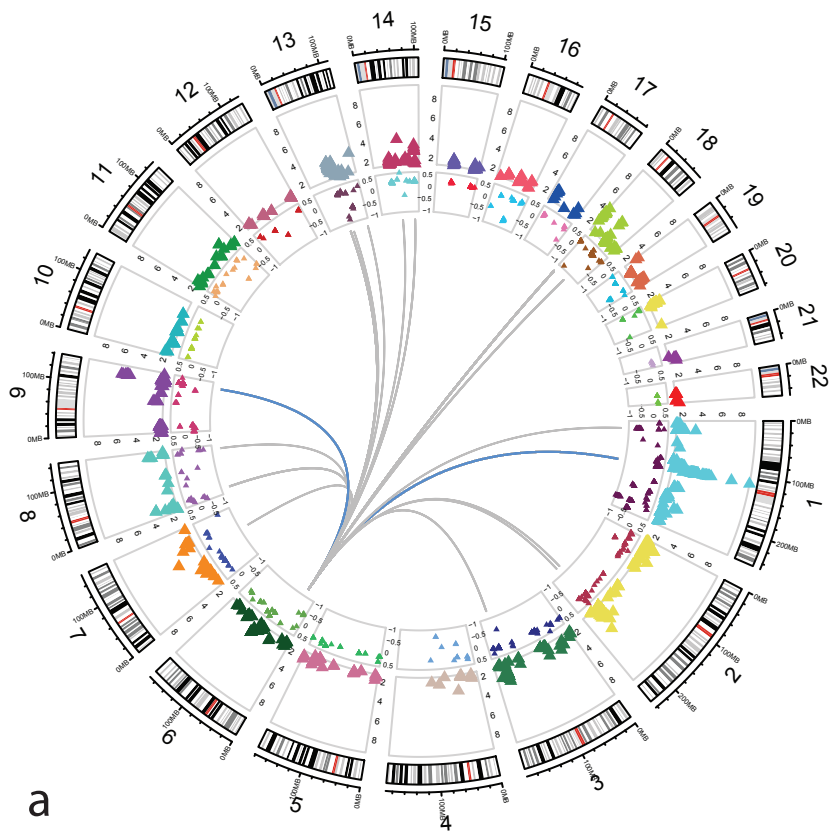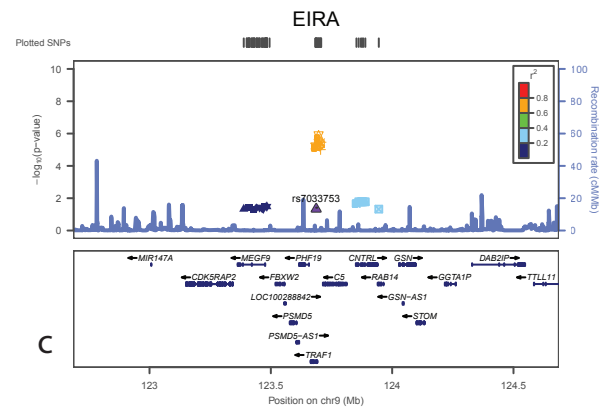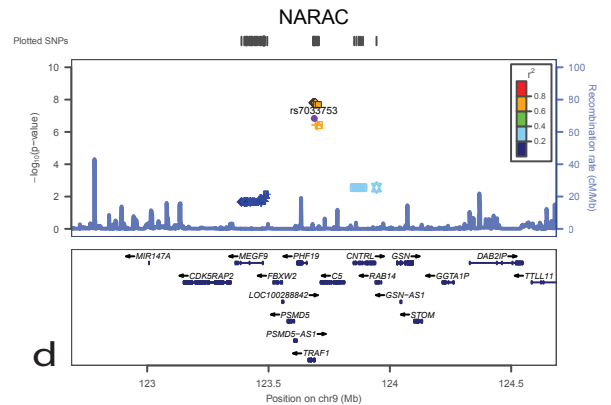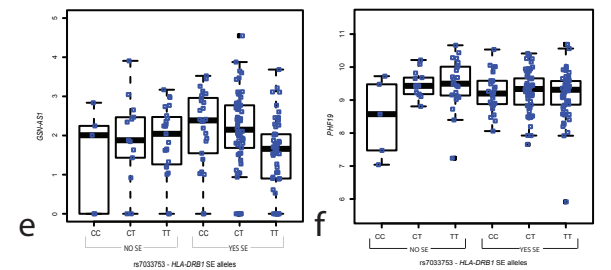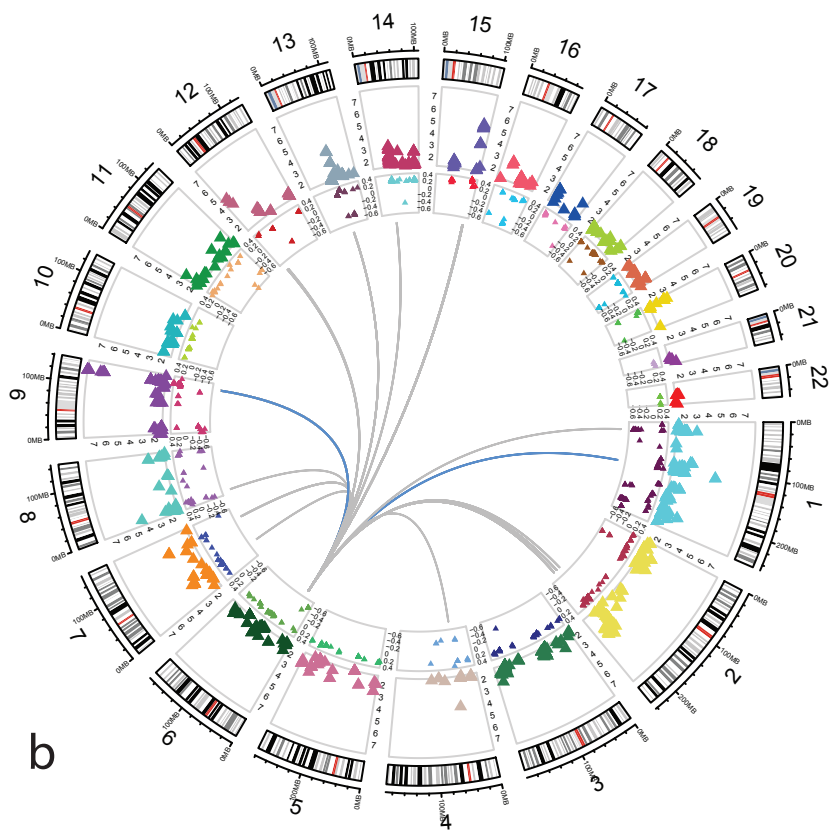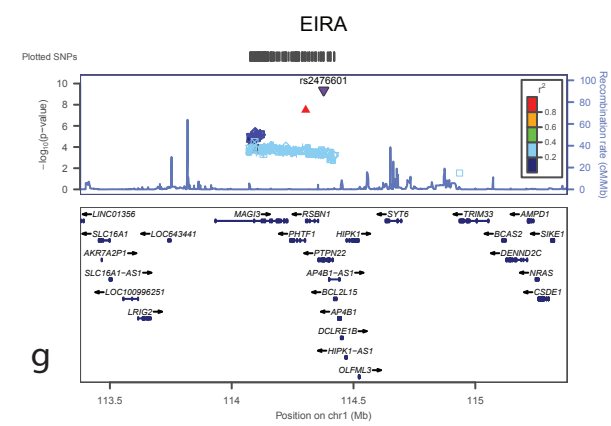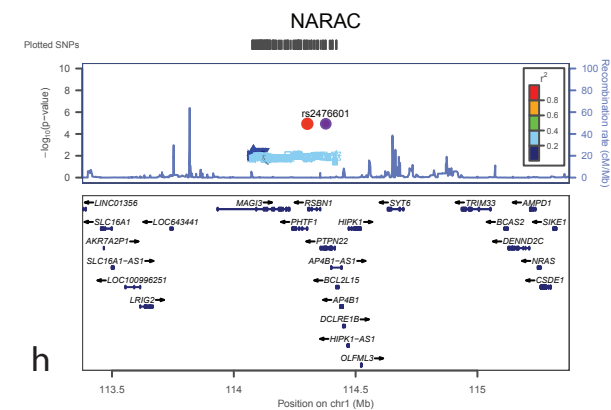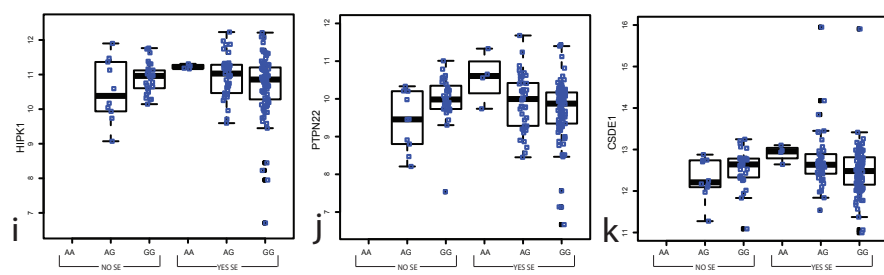

# Figure 5

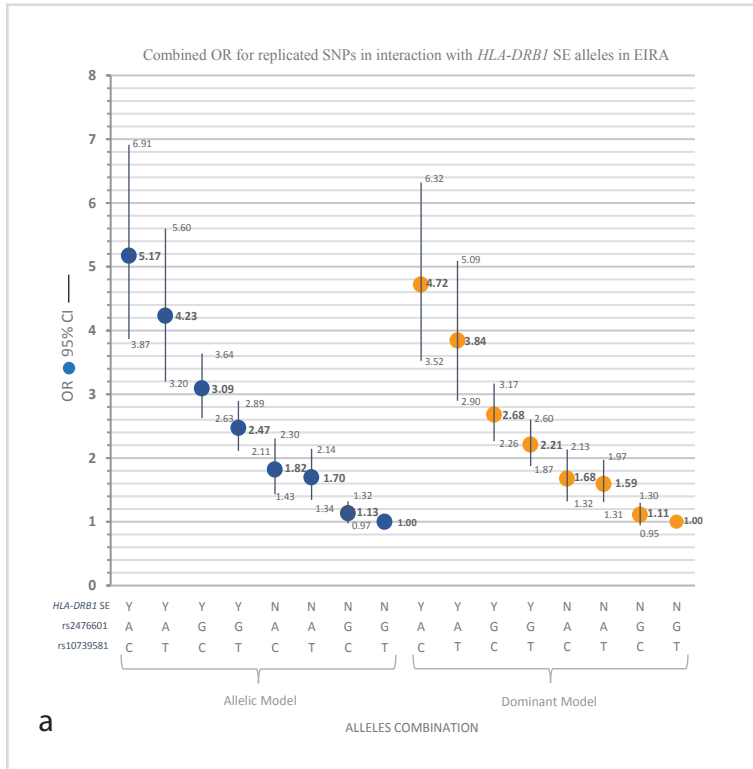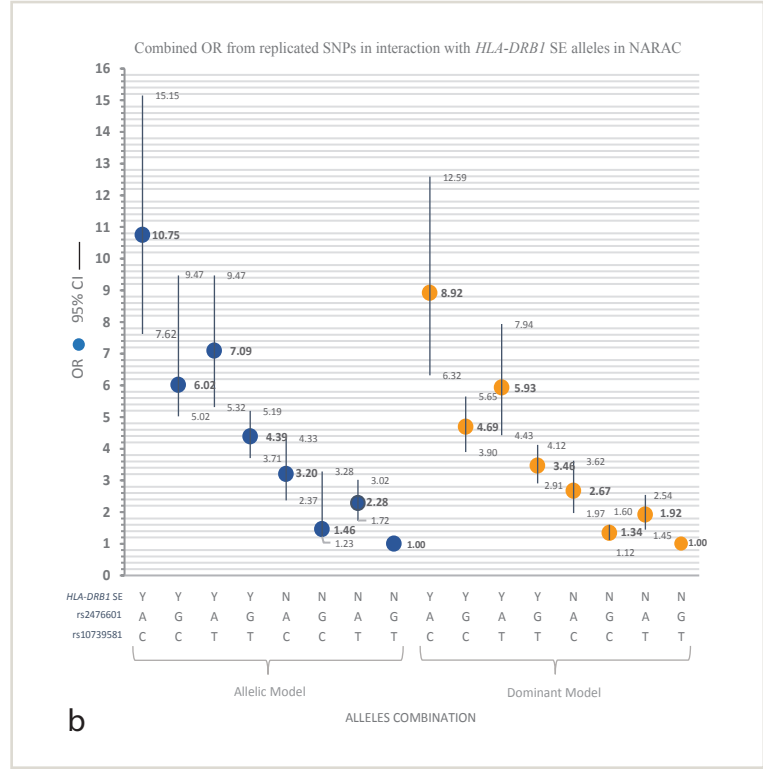

Source: https://www.biorxiv.org/content/10.1101/221416v1.full.pdf
